# Supplementary material for: β-Catenin signaling in alveolar macrophages enhances lung metastasis through a TNF-dependent mechanism
Source: PubMed Central journal article supplement (PMC10243816; doi:10.1172/jci.insight.160978), 2023-04-24
Supplement: jciinsight-8-160978-s041.pdf [file jciinsight-8-160978-s041.pdf]

## **Supplemental Methods**

### **Mice**

All experiments were performed under protocols (1108M, 1117M) approved by the Institutional Animal Care and Use Committee (IACUC) of the Roswell Park Comprehensive Cancer Center. All experiments were performed using female or male mice 8-12 weeks of age, as specified in the next section. Male or female C57BL/6 mice were obtained from the Charles River Laboratories (Wilmington, MA). *Ctnnb1<sup>Ex3Δ/Ex3Δ</sup>* on a C57BL/6 background were kindly provided by Dr. Makoto Taketo (Kyoto University, Kyoto, Japan) (1) via Drs. Aimin Jiang (at Roswell Park, now at the Henry Ford Health System, Detroit, MI) and Björn E. Clausen (University Medical Center of the Johannes Gutenberg-University, Mainz, Germany), and both *Lyz2-cre<sup>+/+</sup>* and *ROSA26-EYFP<sup>+/+</sup>* mice also on a C57BL/6 background were purchased from The Jackson Laboratory (Bar Harbor, ME) (2, 3). Genotyping of mouse strains was performed on DNA isolated from tail clips using the DirectPCR Lysis Reagent (Viagen Biotech) per the manufacturer's instructions. Specific primers for validating the different genotypes are found in Supplemental Table 4.

### **Cell Lines and Tumor Growth Experiments**

The E0771.ML-1 mammary tumor cell line, a more aggressive variant of the parental E0771 cell line, was kindly provided by Dr. Vivek Mittal (Weill Medical College at Cornell University, New York, NY). Cell lines were confirmed to be mycoplasma-negative using the Mycoplasma PCR Primer Set (Agilent Technologies) and authenticated using the Mouse Cell STR Profiling Service provided by the ATCC. E0771.ML-1 cells were cultured in a RPMI-based

culture media (containing 10% heat-inactivated FBS, 20mM HEPES, 100 IU/mL Penicillin, and 100µg/mL Streptomycin). B16F10 were purchased from ATCC (Manassas, VA) and cultured in a DMEM-based culture media (containing 10% heat-inactivated FBS). Both lines were cultured at 37°C with 5% CO<sub>2</sub> and were removed from the flasks by trypsinization. The luciferase expressing LLC (LLC-luc) cell line was kindly provided by Dr. Pamela Hershberger (Roswell Park Comprehensive Cancer Center, Buffalo, NY). LLC-luc cells were maintained in DMEM-based culture media as with B16F10.

For the orthotopic E0771.ML-1 experiments, cells ( $1 \times 10^5$ ) were suspended in a Matrigel and DPBS mixture (at a 1:1 ratio) and were implanted into mammary gland no. 4 of syngeneic female C57BL/6 mice. For the orthotopic B16F10 experiments, cells ( $3 \times 10^5$ ) were suspended in DPBS and were implanted into the skin on the flank of syngeneic male C57BL/6 mice. LLC-luc cells ( $5 \times 10^5$ ) were implanted along the flank in a similar manner as B16F10. Tumor growth was measured 3 times per week, and the volumes were calculated using the formula  $(w^2 \times l)/2$ , where 'w' represents width and 'l' represents length. For the E0771.ML-1 experimental lung metastasis studies, cells ( $1.25 \times 10^5$ ) in DPBS were injected via the tail vein of syngeneic female C57BL/6 mice. For B16F10 and LLC-luc experimental metastasis studies, cells ( $2 \times 10^5$ ) in DPBS were injected via the tail vein of syngeneic male C57BL/6 mice, and experimental metastasis studies were terminated 14 days post injection. (See Supplemental Table 5 for a listing of all biologics, chemical, reagents, cell and animal lines.)

### **In Vivo Treatment Studies**

Alveolar macrophage depletion studies were conducted by administering 60µL of clodronate liposomes (FormuMax) or DPBS as vehicle control under isoflurane anesthesia twice

prior to tail vein injection of E0771.ML-1 tumor cells, and then continued every 3 to 4 days over 14 days for a total of 6 treatments. Localized anti-TNF- $\alpha$  (BioXCell) therapy was performed following the same technique and schedule as above, utilizing 10 $\mu$ g doses of mAb in 50 $\mu$ L or volume-match DPBS.

NLDMs were generated from *Lyz2-Cre<sup>+/+</sup>YFP<sup>+/-</sup>* control or *Lyz2-Cre<sup>+/+</sup>YFP<sup>+/-</sup>* *Cttnb1<sup>Ex3 $\Delta$ /wt</sup>* mice and harvested, as described in the section below on “In vitro Neonatal Liver-Derived Macrophage Differentiation”. NLDMs ( $2.5 \times 10^5$ ) suspended in 50 $\mu$ L of DPBS were administered under isoflurane anesthesia 36 hours prior to tumor cell line implantation via tail vein injection and NLDM adoptive transfer was repeated 7 days post injection.

### **Analyses of the Primary or Metastatic Tumor Microenvironment**

Tumor tissues and lungs were dissected after euthanasia (at the days post-implantation indicated in the specific figures or figure legends) and dissociated into a single-cell suspension using the gentleMACS automatic tissue dissociator system (Miltenyi Biotec) in a collagenase/hyaluronidase cocktail (Stem Cell Technologies) containing 30 $\mu$ g/mL DNase (Roche, Basel, Switzerland), as per the manufacturer’s instructions. Dissociation occurred in a Hybaid rotating incubator (Phoenix Equipment) for 1 hour at 37°C. The resulting mixture was then strained through 100 $\mu$ m SureStrain cell strainers (MTC Bio). Neonatal livers were surgically removed from 1-day old neonates following euthanasia, and mechanically dissociated and passed through a 100 $\mu$ m SureStrain cell strainer. Bone marrow (BM) cells were collected by flushing tibias and femurs. For all tissues, RBCs were lysed using ammonium-chloride-potassium (ACK) lysis buffer, and the cells were then used for further analysis, as described in the appropriate assays.

For quantification of metastasis in the spontaneous lung metastasis setting, the lungs were collected following euthanasia, washed in DPBS, and fixed in 10% formalin. Slides were prepared from formalin-fixed paraffin-embedded blocks, followed by histologic staining with hematoxylin and eosin, and quantification of the metastatic nodules under light microscopy in a blinded manner. For quantification of lung metastasis in the experimental lung metastasis setting, the lungs were removed following euthanasia, washed in DPBS, and fixed in 10% formalin and quantified under a dissecting light microscope in a blinded manner. For quantification of experimental E0771.ML-1 lung metastasis by bioluminescence, a dose of 150mg/kg of D-Luciferin (Goldbio) was administered to each mouse under isoflurane anesthesia by intraperitoneal injection 15 minutes prior to imaging by the IVIS Spectrum (Perkin-Elmer) and acquired and analyzed via Living Image software (v4.7.3). In orthotopic tumor implantation experiments, mice were euthanized 15 minutes after D-luciferin administration and the lungs were surgically removed and imaged *ex vivo*.

### **In vitro Neonatal Liver-Derived Macrophage Differentiation**

Single cell suspensions from neonatal livers (as described under the section on “Tissue Analysis”) were plated at a density of  $5 \times 10^4$  cells/cm<sup>2</sup> in complete RPMI (containing 10% heat-inactivated FBS, 15mM HEPES, 2 mM L-glutamine, 0.1mM nonessential amino acids, 1 mM sodium pyruvate, 100 IU/mL Penicillin, 100µg/mL Streptomycin, and 50µM 2-mercaptoethanol) with 30ng/mL GM-CSF (PeproTech) at 37°C with 5% CO<sub>2</sub>. Media was replaced at day 7, and the cells were recovered for subsequent analysis at day 14. To recover the cells, the media was removed and replaced with CellStripper (Corning) and incubated for 15 minutes at 37°C with



5% CO<sub>2</sub>, followed by vigorous pipetting and a DPBS rinse step to collect the loosely adherent cells.

### **In vitro Bone Marrow-Derived Macrophage Differentiation**

BM single cell suspension (as described under the section on “Tissue Analysis”) were plated at a density of  $7.5 \times 10^4$  cells/cm<sup>2</sup> in complete RPMI with 30ng/mL M-CSF (Peprotech) at 37°C with 5% CO<sub>2</sub> for 6 days.

### **CUT&RUN**

NLDMs were derived from *Lyz2-Cre<sup>+/+</sup>YFP<sup>+/-</sup>* mice (as described under the section on “In vitro Neonatal Liver-Derived Macrophage Differentiation”). CUT&RUN (Cell Signaling Technology) was performed on  $1 \times 10^5$  suspended NLDM cells incubated with rabbit anti-mouse  $\beta$ -catenin or rabbit IgG isotype control overnight at 1:25 and 1:20 concentration, respectively, following the manufacturer’s instructions.  $\beta$ -catenin binding to the *Tnf* and *Axin2* regulatory domains were determined by qPCR with the primers indicated in Supplemental Table 4 using the SYBR-Green (Invitrogen) reaction mix and CFX Maestro 1.1 (Bio-Rad) instrument.

Quantification was measured as fold enrichment =  $2^{(Ct \alpha\text{-}\beta\text{-catenin} - Ct \text{IgG})}$ .

### **ELISA**

NLDMs were derived and collected from the indicated genotypes (as described under the section on “In vitro Neonatal Liver-Derived Macrophage Differentiation”). NLDMs ( $1.5 \times 10^5$ ) were loaded into each well of a 96-well flat-bottomed plate in complete RMPI with 30ng/mL GM-CSF (Peprotech) at 37°C with 5% CO<sub>2</sub> and allowed to adhere for 3 days. Media was

removed and replaced with complete RPMI  $\pm$  LPS (10, 100, or 1000ng/mL) and/or 10mM LiCl (Sigma), or 100ng/mL murine Wnt3a (Peprotech) as indicated in the figure legends. After 24 hours at 37°C with 5% CO<sub>2</sub>, plates were centrifuged at 300g to pellet the cells and 100uL of supernatant was carefully collected. TNF- $\alpha$  ELISA was performed according to the manufacturer's instructions (Biolegend) using a 1:10 dilution of supernatant in buffer for each sample well. Signal was quantified using the Synergy 2 (Biotekand) analyzed via Gen5 software (v1.11).

### **TCGA Analysis**

Survival analysis was performed using the publicly available webtool OncoLnc (<http://www.oncolnc.org/>) where upper and lower tertile cutoffs for Wnt3a mRNA expression were applied. Genes associated with poor overall survival in breast cancer were identified by Anaya utilizing a Cox regression model of data obtained from TCGA representing 1,006 breast cancer patients (4). A gene list containing the top 500 genes associated with poor overall survival, that is, those with the greatest positive Cox coefficient, were assessed for KEGG pathway enrichment using the DAVID Bioinformatics Resource (<https://david.ncifcrf.gov/>) (5, 6).

### **Flow Cytometry**

#### *Analysis of lung active $\beta$ -catenin*

Single cell suspension of lung cells ( $1 \times 10^6$ ) was isolated (as described under the section on "Tissue Analysis") and blocked with anti-mouse CD16/32 for 10 minutes and immunostained with BUV395 anti-mouse CD45 and Live/Dead - Blue for 25 minutes at 4°C in a flow-based

buffer (DPBS with 0.5% BSA and 2mM EDTA) and washed once with the same buffer. Samples were fixed and permeabilized with the FoxP3 Staining Buffer Set (Miltenyi Biotec) following the manufactures instructions. Samples were then split into flow-minus one (FMO) or stained with Ax488 anti-mouse non-phospho active  $\beta$ -catenin (ABC) (Cell Signaling Technology) for overnight incubation at 4°C. Samples were washed according to the staining buffer instructions and analyzed on an LSR II cytometer (BD Biosciences, Mississauga, ON) running FACSDiva (v6.1.3). Data files were analyzed using FCS Express (v7.12).

#### Analysis of the lung microenvironment

Lung cells ( $1 \times 10^6$ ) were isolated (as described in the section on “Tissue Analysis”) and blocked with anti-mouse CD16/32 for 10 minutes and immunostained with mAbs indicated in Supplemental Table 5 for 25 minutes at 4°C in the flow-based buffer and washed once with the same buffer. Samples were then resuspended in the flow-based buffer containing 1.5 $\mu$ M DAPI (Thermofisher), run on an LSR II cytometer and the data analyzed as described above. Data are reported as either the percentage of CD45<sup>+</sup> cells or cells/g of lung were indicated and calculated as *Lung Weight (g)/((% Live Cells/100) x Cell Count)*.

#### Analysis of the tumor microenvironment

Tumor cells ( $1 \times 10^6$ ) were isolated (as described under the section on “Tissue Analysis”) and blocked with anti- mouse CD16/32 for 10 minutes and immunostained with mAbs indicated in Supplemental Table 5 for 25 minutes at 4°C in the flow-based buffer and washed once with the same buffer. Samples were then resuspended in the flow-based buffer containing 1.5 $\mu$ M DAPI (Thermofisher), run on an LSR II cytometer and the data analyzed as described above.

## Fluorescence-Activated Cell Sorting

Lung cells ( $1 \times 10^6$ ) were isolated (as described in the section on “Tissue Analysis”) and blocked with anti-mouse CD16/32 for 10 minutes and immunostained with mAbs indicated in Supplemental Table 5 for 25 minutes at 4°C in the flow-based buffer and washed once with the same buffer. Samples were then resuspended in flow-based buffer containing 1.5µM DAPI (Thermofisher) and the cells sorted using the MA900 Multi-Application Cell Sorter (SONY). Approximately  $10^5$  cells from the “AM+” gate were isolated per sample for RNA isolation and sequencing. Data files were analyzed using FCS Express (v7.12).

## Invasion and Migration Assays

Migration and invasion assays were performed in Transwell migration chambers using a 24-well format (Corning Falcon) tested in triplicate determinations. For migration assays,  $2 \times 10^5$  E0771.ML-1 cells were carefully seeded onto the upper membrane in 200uL of serum-free RPMI (SFM) and allowed to settle for 10 minutes at 37°C. In the invasion assay, a 1:1 mix of 50µL Matrigel and  $1 \times 10^5$  cells suspended in SFM was seeded, set for 30 minutes at 37°C, and coated in 100uL of SFM. Then, 600µL of 24-hr supernatant from *Lyz2-Cre<sup>+/+</sup>YFP<sup>+/-</sup>* control or *Lyz2-Cre<sup>+/+</sup>YFP<sup>+/-</sup>Cttnb1<sup>Ex3Δ/wt</sup>* NLDMs was then added to the lower chamber. Anti-TNF-α neutralizing antibody was added to indicated wells at a final lower chamber concentration of 50µg/mL. Cultures were incubated for either 4- or 18-hrs to assess for migration or invasion capacity, respectively. Cells were fixed in methanol and stained with crystal violet as before counting.

## **RT q-PCR**

Total RNA was isolated using the RNeasy Mini Kit (Qiagen). cDNA was synthesized using the iScript cDNA synthesis kit (Bio-Rad). The cDNA was used for PCR amplification using specific primer sets (Supplemental Table 4). qRT-PCR was performed using CFX Maestro 1.1 (Bio-Rad). SYBR-Green (Invitrogen) was used as the dye for quantification. Data were quantified using the formula-fold change =  $2^{-\Delta\Delta C_t}$ . All results were reported as a ratio of the specific mRNA signal normalized to the housekeeping gene.

## **RNA Sequencing Studies**

### *RNA-seq*

The purification of total and small RNAs were prepared using the miRNeasy mini kit (Qiagen) and immediately lysed and resuspended with the addition of 700 ul of QIAzol Lysis Reagent. The lysate was then left at room temperature for 15 minutes to allow for adequate cell lysis. After addition of chloroform, the homogenate was then separated into aqueous and organic phases by centrifugation. RNA partitions to the upper, aqueous phase, while DNA partitions to the interphase and proteins to the lower, organic phase or the interphase. The upper, aqueous phase was extracted, and ethanol added to provide appropriate binding conditions for all RNA molecules from 18 nucleotides upwards. The sample was then applied to the RNeasy Mini spin column, where the total RNA bound to the membrane and phenol and other contaminants were efficiently washed away. On-column DNase digestion was also performed to remove any residual genomic DNA contamination followed by additional washes. High quality RNA is then eluted in 60 ul of RNase-free water. Quantitative assessment of the purified total RNA was

performed by Qubit Broad Range RNA kit (ThermoFisher). The RNA was further evaluated qualitatively by a 4200 TapeStation (Agilent Technologies).

Illumina compatible NGS libraries were generated using the SMARTer Stranded v2 Ultra Pico Input Total RNA Seq kit (Clontech). 5 ng of total RNA was fragmented based on %DV200 analysis and RIN value and used to synthesize first-strand cDNA utilizing proprietary template switching oligos. Amplified ds cDNA was created by LD PCR using blocked PCR primers and unique sample barcodes were incorporated. The resulting ds cDNA was purified using AmpureXP beads (Beckman Coulter). Ribosomal cDNA was then depleted using R probes, and 12 cycles of PCR using universal PCR primers to complete the library. The final libraries were purified using AmpureXP beads and validated for appropriate size on a 4200 TapeStation D1000 Screentape (Agilent Technologies). The DNA libraries were quantitated using KAPA Biosystems qPCR kit, and pooled together in an equimolar fashion, following experimental design criteria. Each pool was denatured and diluted to 300pM with 1% PhiX control library added. The resulting pool was then loaded into the appropriate NovaSeq Reagent cartridge, as determined by the number of sequencing cycles desired, and sequenced on a NovaSeq6000 following the manufacturer's recommended protocol (Illumina Inc)

### *RNA-seq analysis*

Six paired-end biological samples were obtained. A total of approximately 60 million reads were reported for each sample. First pass base pairs quality control (QC) was performed using Fastqc (v0.10.1). Spliced alignment was done using Bowtie (v1.0.1) and TopHat (v2.0.13), allowing a maximum of 1 mismatch per read. Alignment and downstream analyses were performed using GRCm38 (vM10) GENCODE reference and annotation of the mouse genome.

Separate lane replicates were merged into a single sample alignment file using MergeSamFiles from Picard (v1.97). Read counts were estimated with HTSeq (v0.9.1) using intersection-strict option. Differential expression analyses were performed using DESeq2 (v1.32.0). Downstream and visualization plots are done using regularized log<sub>2</sub> transformation implemented by DESeq2. Heatmaps were generated using the R (v4.1.0) library pheatmap (v1.0.12). Gene Ontology clusters were determined by uploading all significantly upregulated genes ( $p_{adj} < 0.05$ ) in Triple AMs in a gene list to Metascape (<https://metascape.org/>) with kappa set to 0.3 (7). All data are deposited under accession no. GSE200508.

#### *scRNA-seq data acquisition and analysis*

Data sets from Zhu et al. and Travaglini et al. were obtained from GSE164793 and EGAS00001004344, respectively (8, 9). Cellranger 10X h5 files were loaded into R (v4.1.0) using the Hdf5r (v1.3.5) package and analyzed using Seurat (v4.1.0) (10, 11). For Zhu et al. data, “ctr” and “wnt3a” data sets were combined using the Merge function. *Tnf* expression was assessed via the Featureplot and VlnPlot functions. For Travaglini et al data, *CTNNB1* feature plot and *CTNNB1* vs *TNF* scatter plots were generated with the CellxGene webtool (<https://cellxgene.cziscience.com/>) from the “krasnow\_lab\_human\_lung\_cell\_atlas\_10x” dataset. Lung macrophages were selected by expression of the top 10 reported “Cluster 47” markers reported by Travaglini et al. via the Moduelscore function on Merged CD45<sup>+</sup> lung 10X scRNAseq “P1\_3”, “P2\_2” and P3\_7” h5 data files. Pearson correlation between *CTNNB1* and *TNF* was determined by the FeatureScatter function.

## References

1. Harada N, Tamai Y, Ishikawa T, Sauer B, Takaku K, Oshima M, et al. Intestinal polyposis in mice with a dominant stable mutation of the beta-catenin gene. *EMBO J*. 1999;18(21):5931-5942.
2. Clausen BE, Burkhardt C, Reith W, Renkawitz R, Forster I. Conditional gene targeting in macrophages and granulocytes using LysMcre mice. *Transgenic Res*. 1999;8(4):265-277.
3. Srinivas S, Watanabe T, Lin CS, Williams CM, Tanabe Y, Jessell TM, et al. Cre reporter strains produced by targeted insertion of EYFP and ECFP into the ROSA26 locus. *BMC Dev Biol*. 2001;1:4.
4. Anaya J. OncoLnc: linking TCGA survival data to mRNAs, miRNAs, and lncRNAs. *PeerJ Computer Science*. 2016.
5. Huang da W, Sherman BT, Lempicki RA. Systematic and integrative analysis of large gene lists using DAVID bioinformatics resources. *Nat Protoc*. 2009;4(1):44-57.
6. Huang da W, Sherman BT, Lempicki RA. Bioinformatics enrichment tools: paths toward the comprehensive functional analysis of large gene lists. *Nucleic Acids Res*. 2009;37(1):1-13.
7. Zhou Y, Zhou B, Pache L, Chang M, Khodabakhshi AH, Tanaseichuk O, et al. Metascape provides a biologist-oriented resource for the analysis of systems-level datasets. *Nat Commun*. 2019;10(1):1523.
8. Zhu BB, Wu Y, Huang S, Zhang RX, Son YM, Li CF, et al. Uncoupling of macrophage inflammation from self-renewal modulates host recovery from respiratory viral infection. *Immunity*. 2021;54(6):1200-+
9. Travaglini KJ, Nabhan AN, Penland L, Sinha R, Gillich A, Sit RV, et al. A molecular cell atlas of the human lung from single-cell RNA sequencing. *Nature*. 2020;587(7835):619-625.
10. Satija R, Farrell JA, Gennert D, Schier AF, Regev A. Spatial reconstruction of single-cell gene expression data. *Nat Biotechnol*. 2015;33(5):495-502.
11. Stuart T, Butler A, Hoffman P, Hafemeister C, Papalexi E, Mauck WM, 3rd, et al. Comprehensive Integration of Single-Cell Data. *Cell*. 2019;177(7):1888-902 e21.



# Supplemental Figure 1

**A**

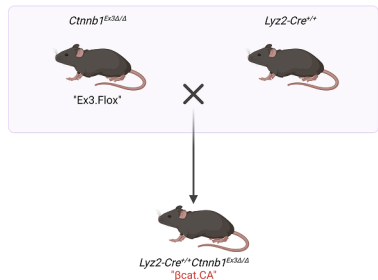

**B**

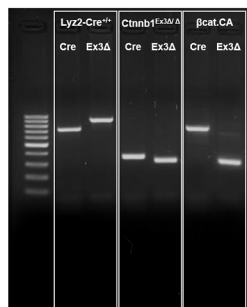

**C**

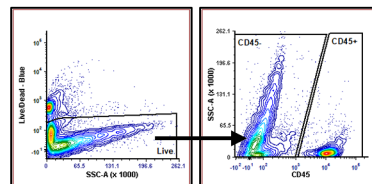

**D**

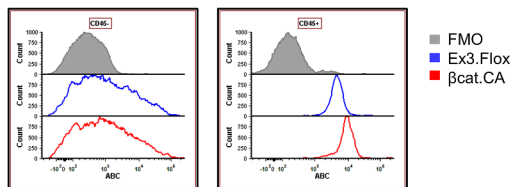

**E**

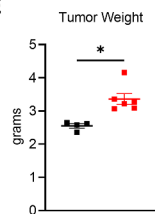

**F**

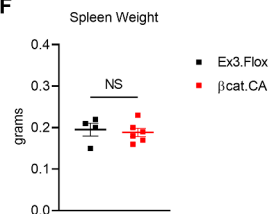

**G**

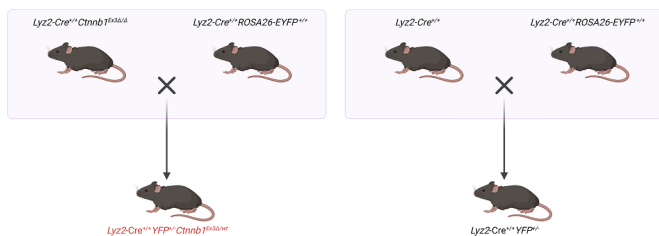

**H**

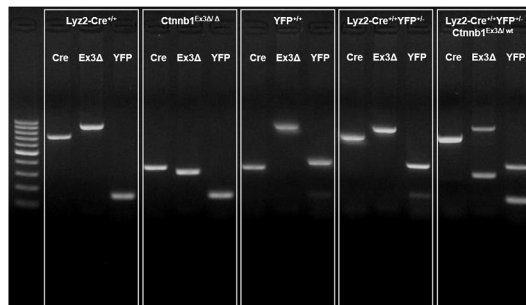

**Supplemental Figure 1. Validation of  $Lyz2\text{-cre}^{+/+}Ctnnb1^{Ex3\Delta/Ex3\Delta}$  model.** (A) Schematic of the C57BL/6 mouse breeding strategy for  $Ctnnb1^{Ex3\Delta/\Delta}$  (Ex3.Flox) and  $Lyz2\text{-cre}^{+/+}Ctnnb1^{Ex3\Delta/\Delta}$  ( $\beta\text{cat.CA}$ ) mice. (B)  $Lyz2\text{-cre}^{+/+}$ ,  $Ctnnb1^{Ex3\Delta/\Delta}$ , and  $Lyz2\text{-cre}^{+/+}Ctnnb1^{Ex3\Delta/\Delta}$  ( $\beta\text{cat.CA}$ ) genotyping of mice described in A, representative of three independent experiments. (C) Flow cytometry gating strategy for  $CD45^-$  stroma and  $CD45^+$  leukocytes after fixable live/dead staining of dissociated non-tumor bearing lung. (D) Non-phosphorylated active  $\beta$ -catenin (ABC) intracellular staining of Ex3.Flox and  $\beta\text{cat.CA}$  lungs, as gated in C. (E) Tumor and (F) spleen weights from E0771.ML-1-bearing mice at day 27 post-implantation as described in *Figure 1C*; statistical analysis is based 2-tailed *t*-test. (G) Schematic of C57BL/6 mouse breeding strategy for  $Lyz2\text{-Cre}^{+/+}YFP^{+/-}Ctnnb1^{Ex3\Delta/wt}$  and  $Lyz2\text{-Cre}^{+/+}YFP^{+/-}$  C57BL/6 mice. (H) genotyping of mice from G representative of three independent experiments. Data are recorded as the mean  $\pm$  SEM of the indicated data points; \* =  $p < 0.05$ , NS = not significant.

# Supplemental Figure 2

## A

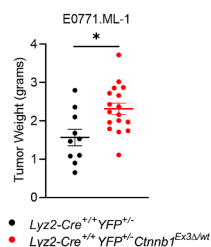

## B

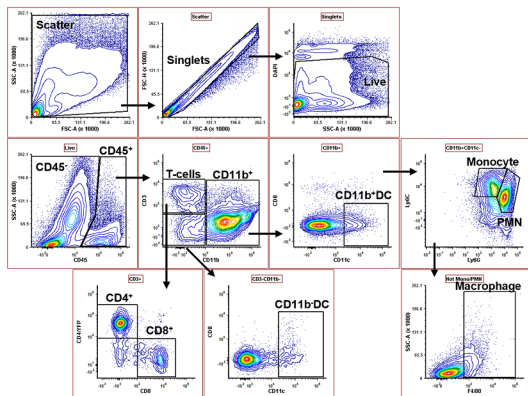

## C

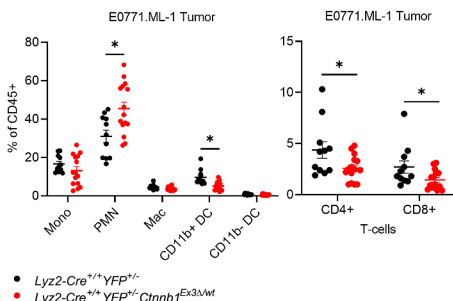

## D

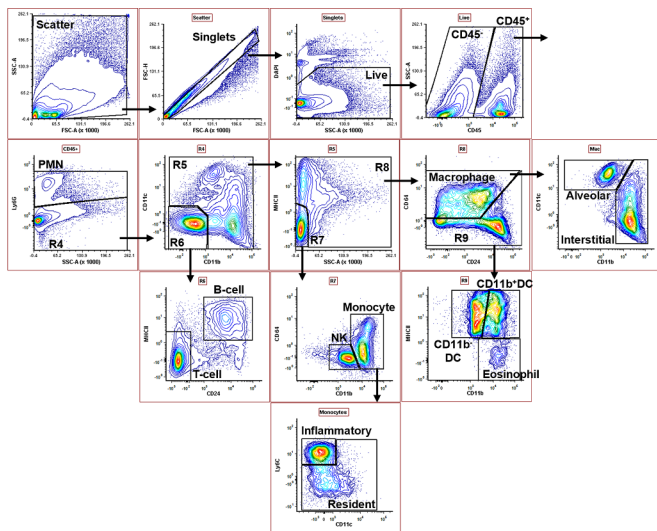

## E

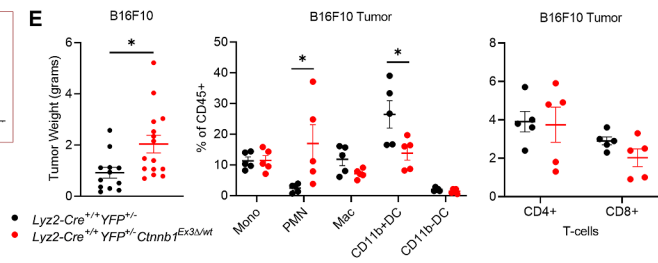

## F

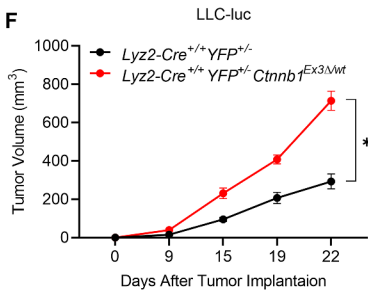

## G

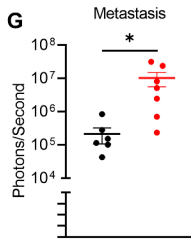

## H

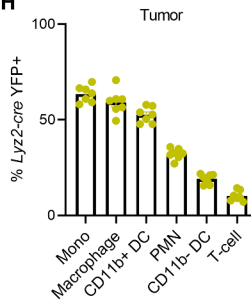

## I

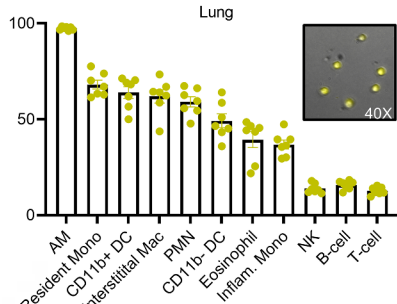

**Supplemental Figure 2. *Lyz2-cre*<sup>+/+</sup>*Ctnnb1*<sup>Ex3Δ/wt</sup>*ROSA26-EYFP*<sup>+/-</sup> validation and TME characterization.** (A) Primary E0771.ML-1 tumor weights from *Figure 2A*. (B) Flow cytometry gating strategy for dissociated primary tumor tissues. (C) Myeloid, *left*, and lymphoid, *right*, components from the TME of *Figure S2A*, gated as in *S*; n = 10-17; 2-tailed *t*-test. (D) Flow cytometry gating strategy for dissociated lung tissue, as adapted from Yu et al. (E) *Left*, primary tumor weights from the TME of *Figure 2E*; myeloid, *middle*, and lymphoid, *right*, components from *Figure 2E*; n = 5-15; 2-tailed *t*-test. (F) Primary tumor growth of implanted LLC-luc tumor cells in *Lyz2-Cre*<sup>+/+</sup>*YFP*<sup>+/-</sup>*Ctnnb1*<sup>Ex3Δ/wt</sup> and *Lyz2-Cre*<sup>+/+</sup>*YFP*<sup>+/-</sup> C57BL/6 mice; n = 6-7; statistical analysis based on 2-way ANOVA. (G) Bioluminescence of ex vivo-imaged lungs in *E*; 2-tailed *t*-test. (H) Percentage of cell populations from dissociated tumor or (I) lung tissues positive for *Lyz2*-YFP expression in E0771.ML-1-bearing *Lyz2-Cre*<sup>+/+</sup>*YFP*<sup>+/-</sup> mice as gated in *Figure S2B* or *S2D*, respectively. Inset reflects bronchioalveolar lavage (BAL) AMs at 40X original magnification, representative of 7 individual mice; n = 7, 2-tailed *t*-test. Data are recorded as the mean ± SEM of the indicated data points; \* = p < 0.05, NS = not significant.

# Supplemental Figure 3

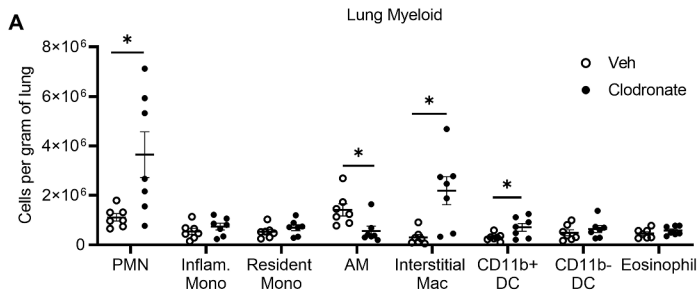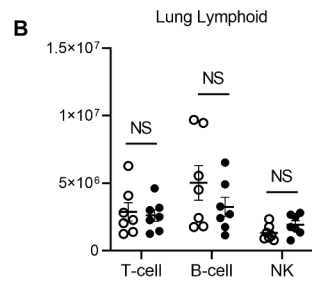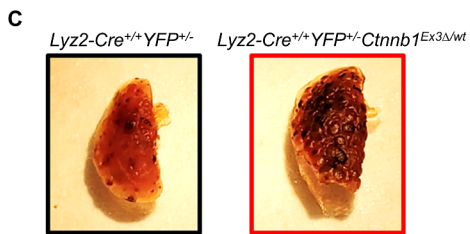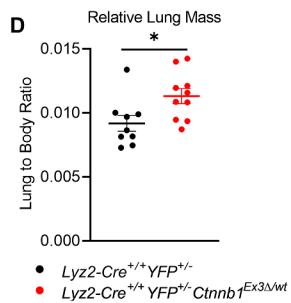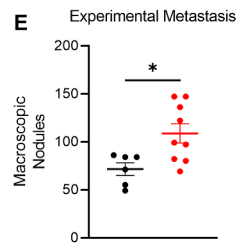

**Supplemental Figure 3. Clodronate liposomes specifically deplete AMs.** (A) Myeloid and (B) lymphoid lung environments of non-tumor bearing *Lyz2-Cre<sup>+/+</sup>YFP<sup>+/-</sup>* mice following the clodronate liposome or vehicle control pre-depletion schedule from *Figure 3A*; n = 7; 2-tailed *t*-test. (C) Representative images of lungs from *Lyz2-Cre<sup>+/+</sup>YFP<sup>+/-</sup>Ctnnb1<sup>Ex3Δ/wt</sup>* and *Lyz2-Cre<sup>+/+</sup>YFP<sup>+/-</sup>* mice at endpoint 14 days post-tail vein injection of B16F10 cells, representative of two independent experiments. (D) Macroscopic lung nodule counts and (E) lung mass corrected for total body weight at endpoint represented in C; n = 6-9, 2-tailed *t*-test. Data are recorded as the mean ± SEM of the indicated data points; \* = p < 0.05, NS = not significant.

# Supplemental Figure 4

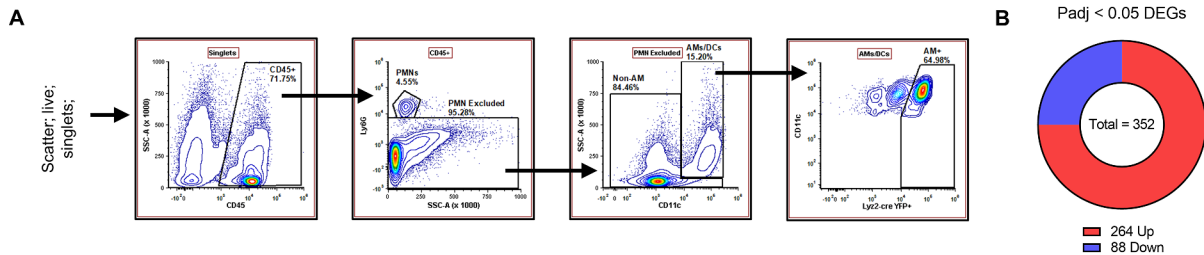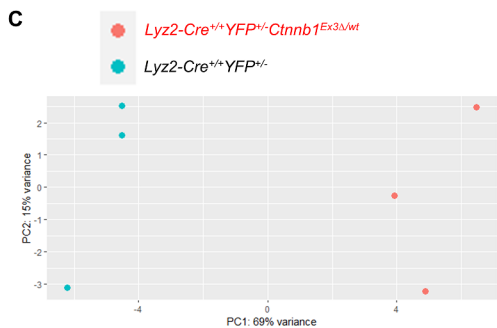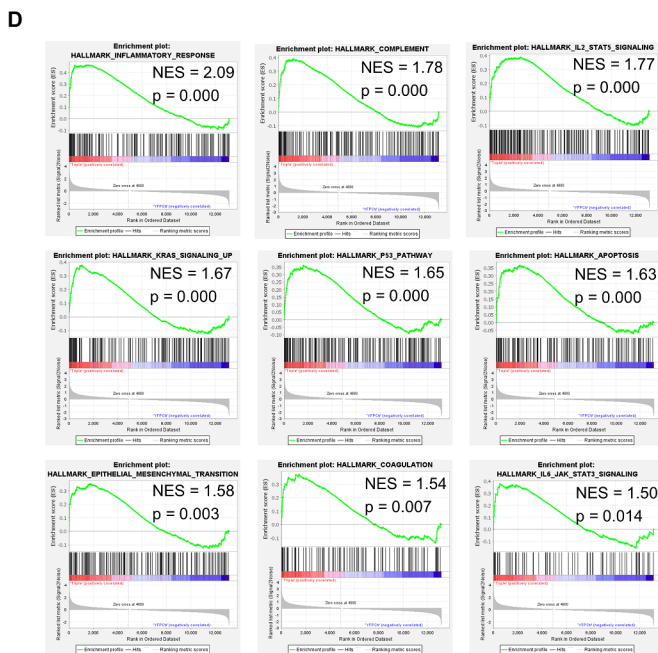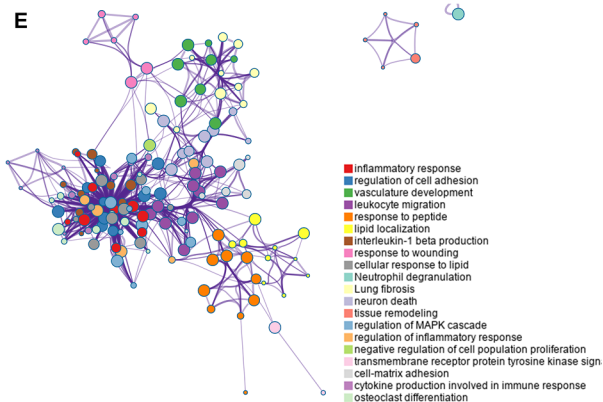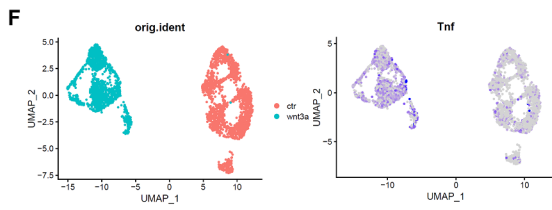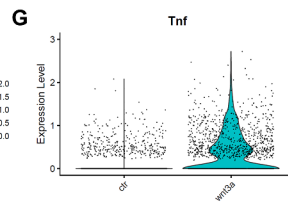

**Supplemental Figure 4. Transcriptomic analyses of flow-sorted AMs. (A)** Flow cytometry-assisted cell sorting gating strategy for AM isolation for bulk RNA-seq from lungs of non-tumor bearing *Lyz2-Cre<sup>+/+</sup>YFP<sup>+/-</sup>Ctnnb1<sup>Ex3Δ/wt</sup>* or *Lyz2-Cre<sup>+/+</sup>YFP<sup>+/-</sup>* mice. **(B)** Number of DEGs from *A* with adjusted p-value < 0.05 up- or down-regulated in *Lyz2-Cre<sup>+/+</sup>YFP<sup>+/-</sup>Ctnnb1<sup>Ex3Δ/wt</sup>* AMs depicted in *Figure 4A*. **(C)** Principal component analysis (PCA) of variable genes between biological replicates. **(D)** GSEA plots for pathways identified in *Figure 4C*. **(E)** Metascape Gene Ontology analysis of significantly (p-adj > 0.05) upregulated DEGs in *Lyz2-Cre<sup>+/+</sup>YFP<sup>+/-</sup>Ctnnb1<sup>Ex3Δ/wt</sup>* AMs. **(F)** *Left*, single-cell RNA-seq of control (ctr) or Wnt3a-treated (wnt3a) BAL-derived AMs from Zhu et al. (GSE164793) UMAP, *right*, *Tnf* expression Featureplot. **(G)** *Tnf* expression in ctr vs. wnt3a from *F*; p = 1.21 x 10<sup>-100</sup>, Wilcox rank sum test.



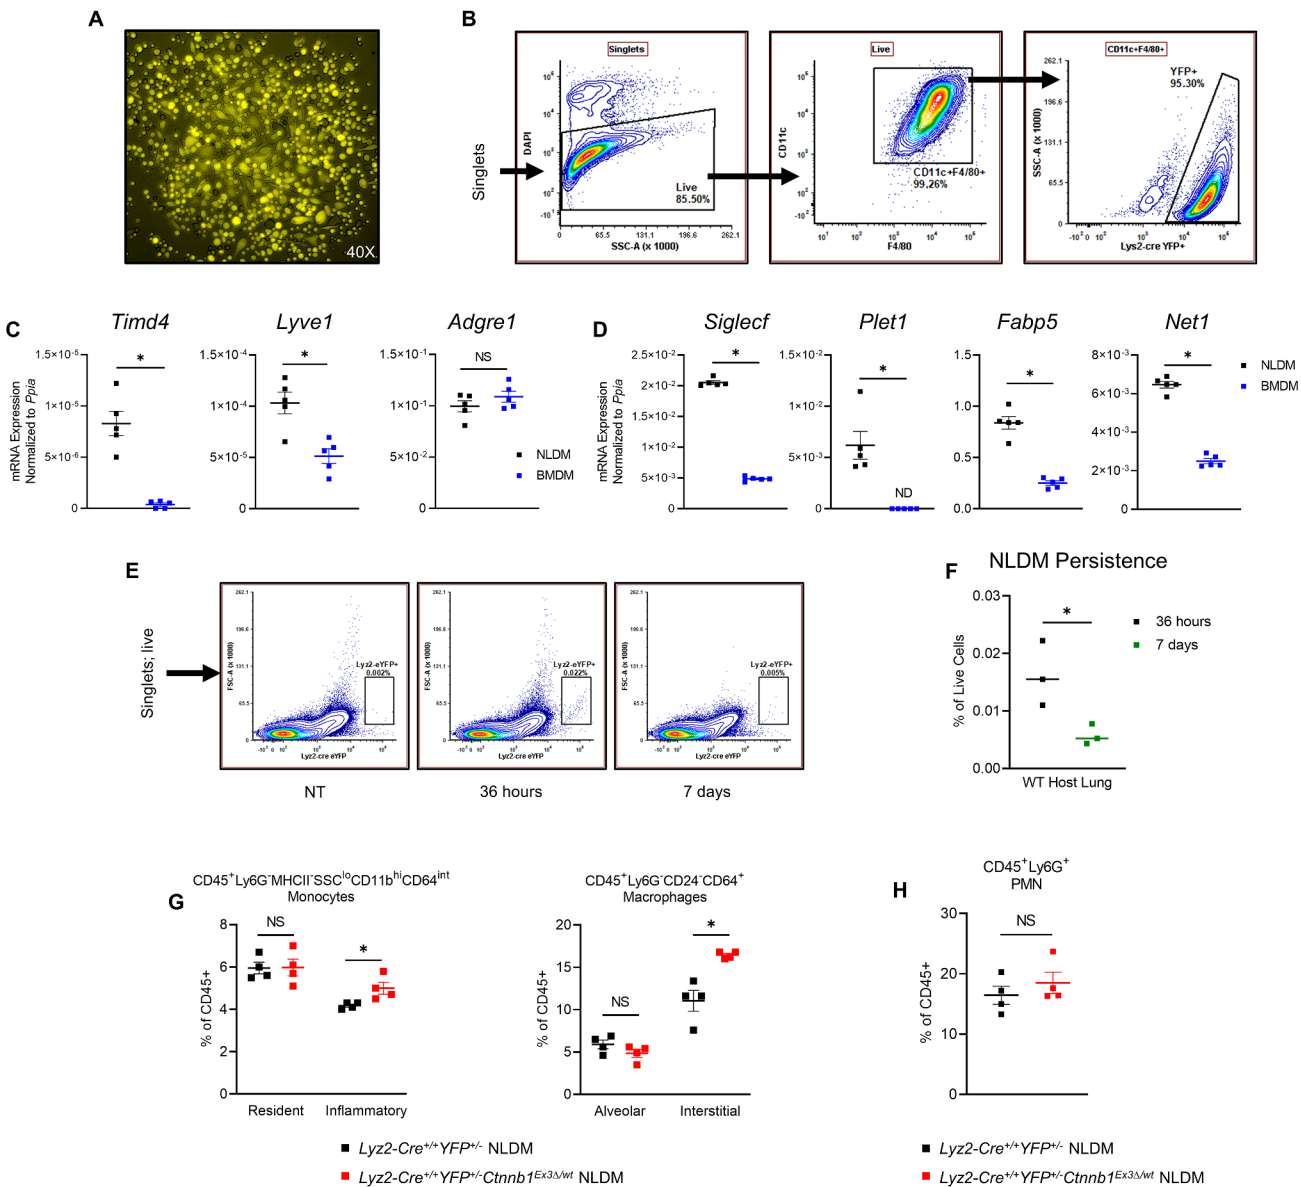

**Supplemental Figure 5. Characterization of the NLDM primary cell line model. (A)**

Fluorescence microscopy image of YFP expression in unstimulated *Lyz2-Cre<sup>+/+</sup>YFP<sup>+/-</sup>*-derived NLDMs after 14 days of culture at 40X original magnification, and **(B)** flow cytometry gating of *Lyz2-Cre<sup>+/+</sup>YFP<sup>+/-</sup>* NLDMs from *A*, representative of 5 biological replicates. **(C)** RT-qPCR of *Timd4*, *Lyve1*, and *Adgre1* (F4/80) of unstimulated *Lyz2-Cre<sup>+/+</sup>YFP<sup>+/-</sup>* NLDMs or BMDMs, collected after 14 and 6 days in culture, respectively. **(D)** RT-qPCR of *Siglecf*, *Plet1*, *Fabp6*, and *Net1* in *Lyz2-Cre<sup>+/+</sup>YFP<sup>+/-</sup>* NLDMs or BMDMs from *C*; n = 5; 2-tailed *t*-test. **(E)** Flow cytometry plots of WT C57BL/6 hosts following no treatment (NT) or intranasal adoptive transfer of *Lyz2-Cre<sup>+/+</sup>YFP<sup>+/-</sup>* NLDMs 36 hours or 7 days prior, representative of 3 biological replicates. **(F)** Quantification of the relative abundance of *Lyz2-Cre<sup>+/+</sup>YFP<sup>+/-</sup>* NLDMs from *E* at 36 hours or 7 days post-intranasal transfer; n = 3, 2-tailed *t*-test. **(G)** Abundance of macrophages and monocytes from *Figure 5G* at endpoint and **(H)** abundance of PMNs, as in *G*; n = 5, 2-tailed *t*-test. Data are recorded as the mean ± SEM of the indicated data points; \* = p < 0.05, NS = not significant.

# Supplemental Figure 6

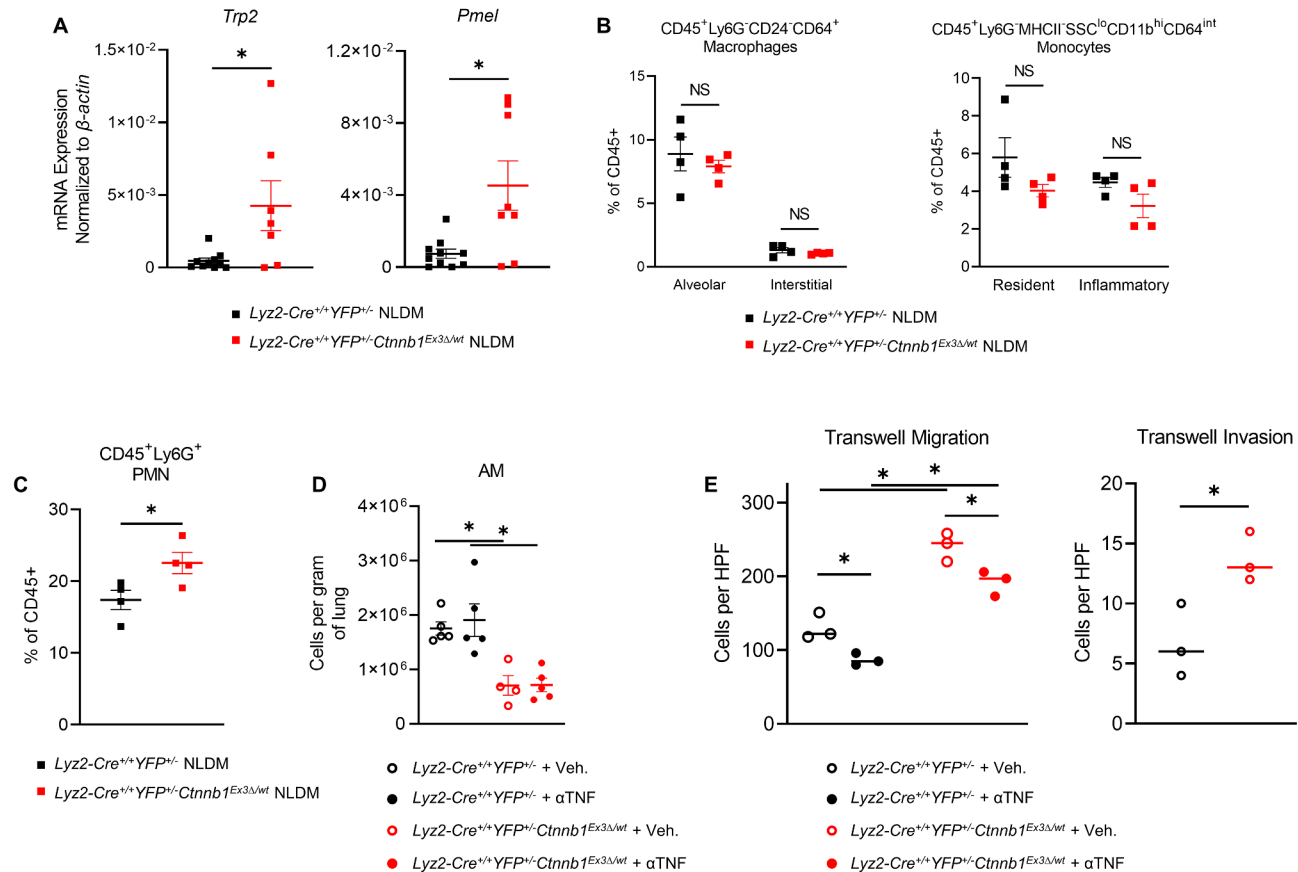

**Supplemental Figure 6. Localized adoptive transfer of  $\beta$ -catenin activated NLDMs increases experimental metastasis in B16F10, and pathway activation promotes E0771.ML-1 tumor cell migration and invasion in vitro.** (A) RT-qPCR mRNA expression of *left*, *Trp2* and *right*, *Pmel* from single cell-digested lungs from B16F10 via tail vein, via the same treatment protocol described in *Figure 5F*;  $n = 7-10$ , 2-tailed *t*-test. (B & C) Lung immune cell abundances from mice from *A*;  $n = 5$ , 2-tailed *t*-test. (D) Absolute abundance of CD45<sup>+</sup>Ly6G<sup>-</sup>CD24<sup>-</sup>CD64<sup>+</sup>CD11b<sup>lo</sup>CD11c<sup>+</sup> AMs from *Figure 6B*. (E) *Left*, migration of E0771.ML-1 cells across 8 $\mu$ m Transwell insert after 8 hr incubation with *Lyz2-Cre*<sup>+/+</sup>*YFP*<sup>+/-</sup>*Ctnnb1*<sup>Ex3 $\Delta$ /wt</sup> or *Lyz2-Cre*<sup>+/+</sup>*YFP*<sup>+/-</sup> NLDM supernatant untreated or with 50 $\mu$ g/mL  $\alpha$ TNF antibody;  $n = 3$ , 2-tailed *t*-test. (F) Invasion of E0771.ML-1 cells across a Matrigel matrix in a Transwell assay as in *E*;  $n = 3$ , 2-tailed *t*-test. Data are recorded as the mean  $\pm$  SEM of the indicated data points; \* =  $p < 0.05$ , NS = not significant.

**Kramer et al. Supplemental Table 1**Positive log<sub>2</sub>FoldChange = UP regulated in Lyz2-Cre<sup>+/+</sup>YFP<sup>+/-</sup>Ctnnb1Ex3Δ/wt relative to Lyz2-Cre<sup>+/+</sup>YFP<sup>+/-</sup>

| Gene    | baseMean    | log <sub>2</sub> FoldChange | pvalue   | padj     |
|---------|-------------|-----------------------------|----------|----------|
| Cd63    | 511.523841  | 2.212904627                 | 2.44E-61 | 3.13E-57 |
| Lyz1    | 1335.362456 | 4.86082454                  | 1.59E-47 | 1.02E-43 |
| Pla2g7  | 291.3475414 | 2.731331563                 | 8.90E-45 | 3.79E-41 |
| Mfge8   | 330.0757964 | 2.494378757                 | 2.08E-43 | 6.64E-40 |
| Abca1   | 1438.455281 | 1.82760092                  | 1.56E-34 | 3.99E-31 |
| Gpnmb   | 2925.583021 | 1.643355321                 | 4.86E-33 | 1.04E-29 |
| C3ar1   | 189.4112946 | 2.520754581                 | 1.38E-32 | 2.26E-29 |
| Mmp12   | 312.4678463 | 2.270506622                 | 1.41E-32 | 2.26E-29 |
| Gm14023 | 540.3342772 | 1.56947105                  | 1.47E-30 | 2.09E-27 |
| Tnf     | 698.895157  | 1.669110551                 | 1.04E-28 | 1.33E-25 |
| Il1a    | 415.5235523 | 1.533822903                 | 1.87E-27 | 2.18E-24 |
| Pdk4    | 120.5510752 | 2.468112766                 | 1.06E-24 | 1.13E-21 |
| Ctsk    | 1214.446215 | 1.314834509                 | 1.62E-24 | 1.60E-21 |
| Scd1    | 179.1578873 | 2.20841949                  | 5.63E-24 | 5.15E-21 |
| F10     | 1454.010454 | 1.100026823                 | 3.89E-22 | 3.32E-19 |
| Igf1    | 249.9931147 | 2.15872812                  | 1.47E-21 | 1.17E-18 |
| Clec5a  | 242.4683148 | 1.457977615                 | 2.77E-20 | 2.08E-17 |
| Emp1    | 425.7624357 | 1.33900852                  | 7.13E-20 | 5.07E-17 |
| Myo5a   | 1071.8173   | 0.993265731                 | 2.41E-19 | 1.62E-16 |
| Pdnp    | 54.57966517 | 3.297076593                 | 1.67E-18 | 1.07E-15 |
| Ecm1    | 127.4824459 | 2.152154606                 | 2.06E-18 | 1.25E-15 |
| Anpep   | 323.8800874 | 1.54158401                  | 2.69E-18 | 1.56E-15 |
| Cxcl1   | 123.2539771 | 2.01375772                  | 3.18E-18 | 1.77E-15 |
| Nt5e    | 142.3646286 | 1.684671554                 | 4.03E-18 | 2.15E-15 |
| Fstl1   | 274.2827724 | 3.272783562                 | 5.88E-18 | 3.01E-15 |
| Ccl3    | 270.7711231 | 1.264395587                 | 3.60E-17 | 1.77E-14 |
| Fam20c  | 64.11635743 | 2.881892018                 | 4.05E-17 | 1.92E-14 |
| Ccl2    | 75.82379437 | 2.323980335                 | 6.26E-17 | 2.86E-14 |
| Mmp8    | 88.40495224 | 2.243636382                 | 6.69E-17 | 2.95E-14 |
| Spp1    | 1172.095097 | 1.047162759                 | 7.43E-17 | 3.17E-14 |
| Lepr    | 616.1997179 | 1.190321098                 | 3.24E-16 | 1.34E-13 |
| Il1rn   | 815.2761614 | 1.056126296                 | 1.76E-15 | 7.03E-13 |
| F7      | 1038.64245  | -0.822855582                | 4.29E-15 | 1.66E-12 |
| Cdh1    | 600.35251   | 1.158888304                 | 4.01E-14 | 1.51E-11 |
| Trem2   | 164.1189208 | 1.637538443                 | 4.15E-14 | 1.52E-11 |
| Scd2    | 363.5783942 | 1.235489894                 | 5.07E-14 | 1.80E-11 |
| Kat6b   | 553.2022551 | 1.006243964                 | 7.08E-14 | 2.45E-11 |
| Tnfaip3 | 1766.2206   | 1.084401321                 | 1.01E-13 | 3.39E-11 |
| Dock3   | 32.23485129 | 3.610090809                 | 2.24E-13 | 7.34E-11 |
| Emilin1 | 370.6766949 | -1.203686455                | 2.99E-13 | 9.57E-11 |
| Itgam   | 426.983276  | 1.043722953                 | 3.17E-13 | 9.85E-11 |
| Cspg4   | 179.4970869 | 1.569741983                 | 3.23E-13 | 9.85E-11 |
| Cpne5   | 254.2655271 | -1.307411676                | 3.65E-13 | 1.09E-10 |
| Colec12 | 277.5157441 | 1.465519098                 | 4.43E-13 | 1.29E-10 |
| Egr3    | 232.3326141 | 1.354920596                 | 5.00E-13 | 1.42E-10 |
| Malt1   | 759.8821227 | 0.889056463                 | 8.23E-13 | 2.29E-10 |

|               |             |              |          |          |
|---------------|-------------|--------------|----------|----------|
| Tmem119       | 64.32308891 | 2.273473235  | 9.46E-13 | 2.57E-10 |
| Lilr4b        | 706.9661352 | 0.8443959    | 1.11E-12 | 2.96E-10 |
| Bhlhe40       | 2116.614565 | 0.70809137   | 1.28E-12 | 3.35E-10 |
| Stra6l        | 104.3573819 | 1.732718078  | 1.87E-12 | 4.79E-10 |
| Sema3e        | 224.5740091 | 1.252047019  | 2.35E-12 | 5.88E-10 |
| Gdf15         | 286.1405763 | 1.077867446  | 2.39E-12 | 5.88E-10 |
| 1700071M16Rik | 95.00409777 | 1.950725672  | 2.54E-12 | 6.13E-10 |
| Syng1         | 31.63454441 | 4.217249544  | 3.57E-12 | 8.45E-10 |
| Nfkbiz        | 1216.258958 | 0.859537712  | 4.00E-12 | 9.31E-10 |
| Fpr2          | 229.898555  | -1.17599588  | 5.83E-12 | 1.33E-09 |
| Rab44         | 988.0749646 | -0.934910802 | 1.00E-11 | 2.25E-09 |
| Tnfsf9        | 58.70895833 | 2.013544795  | 1.11E-11 | 2.46E-09 |
| Nlrp3         | 919.5025815 | 0.950870247  | 1.48E-11 | 3.20E-09 |
| Lgmn          | 952.8442623 | 0.790305261  | 2.34E-11 | 5.00E-09 |
| Rgcc          | 280.6411466 | 1.077981682  | 4.02E-11 | 8.44E-09 |
| Gm16907       | 206.7768982 | 1.212433227  | 4.67E-11 | 9.63E-09 |
| Ccl7          | 28.9351389  | 3.456011443  | 5.58E-11 | 1.13E-08 |
| Mt1           | 695.5930302 | 0.730864224  | 7.17E-11 | 1.43E-08 |
| Pltp          | 1066.456118 | 0.927334325  | 9.47E-11 | 1.86E-08 |
| Cxcl2         | 1052.994831 | 0.888408788  | 9.87E-11 | 1.91E-08 |
| Fn1           | 8743.593131 | 0.948198234  | 1.01E-10 | 1.94E-08 |
| Dysf          | 221.5522872 | 1.132089143  | 1.69E-10 | 3.17E-08 |
| Fmn1          | 444.1833629 | 0.809347868  | 3.07E-10 | 5.70E-08 |
| Cd200r2       | 21.60248675 | 4.18350743   | 7.94E-10 | 1.45E-07 |
| Slc6a8        | 54.09202152 | 1.98510966   | 8.25E-10 | 1.49E-07 |
| Dhcr24        | 164.8107492 | -1.462917784 | 8.62E-10 | 1.53E-07 |
| Lhfp12        | 356.3136375 | 0.902602941  | 1.02E-09 | 1.79E-07 |
| Socs3         | 422.6195123 | 0.924079814  | 1.11E-09 | 1.92E-07 |
| Egr1          | 2519.524823 | 0.766013592  | 1.57E-09 | 2.68E-07 |
| Zranb3        | 58.30391251 | 1.810361248  | 1.73E-09 | 2.91E-07 |
| Ptafr         | 92.41324153 | 1.443683017  | 2.58E-09 | 4.28E-07 |
| Atf3          | 918.3302069 | 0.6962881    | 2.78E-09 | 4.56E-07 |
| Gas7          | 246.0962488 | 0.971490099  | 3.30E-09 | 5.29E-07 |
| Plau          | 179.1510369 | 1.374803949  | 3.31E-09 | 5.29E-07 |
| 2010111I01Rik | 379.5051153 | 0.970740471  | 3.52E-09 | 5.56E-07 |
| C77080        | 734.4695389 | 0.814460331  | 3.92E-09 | 6.12E-07 |
| Ccr12         | 399.8735826 | 1.002548358  | 5.79E-09 | 8.93E-07 |
| Slc7a11       | 131.3128868 | 1.205592317  | 6.74E-09 | 1.03E-06 |
| Fosb          | 2457.053855 | 0.669629466  | 7.63E-09 | 1.15E-06 |
| Hk2           | 491.809239  | 0.901988388  | 7.93E-09 | 1.18E-06 |
| Ksr2          | 21.58150624 | 3.216542368  | 8.57E-09 | 1.26E-06 |
| Adgrl3        | 259.259717  | -0.889311737 | 1.20E-08 | 1.74E-06 |
| Slc37a2       | 106.5551293 | 1.274104763  | 1.27E-08 | 1.82E-06 |
| Msr1          | 118.1992911 | 1.319974396  | 1.33E-08 | 1.89E-06 |
| Dkk2          | 21.31439686 | 5.413967266  | 1.51E-08 | 2.12E-06 |
| Fam3c         | 442.1403282 | 0.764783066  | 1.73E-08 | 2.40E-06 |
| Fancc         | 109.8308209 | 1.285801292  | 1.90E-08 | 2.62E-06 |
| Rgs7bp        | 24.98999564 | 3.090087146  | 1.93E-08 | 2.62E-06 |
| Myli1         | 425.4907409 | 0.80127722   | 2.39E-08 | 3.22E-06 |

|               |             |              |          |             |
|---------------|-------------|--------------|----------|-------------|
| Cd300a        | 204.0900148 | 0.917040752  | 2.71E-08 | 3.61E-06    |
| Lilrb4a       | 1461.7566   | 0.64889532   | 2.84E-08 | 3.74E-06    |
| Bcl2l11       | 465.9187919 | 0.708708336  | 4.52E-08 | 5.90E-06    |
| Nr4a3         | 1291.106516 | 0.796610169  | 5.11E-08 | 6.60E-06    |
| Sgms2         | 149.1509638 | 1.031632338  | 6.05E-08 | 7.74E-06    |
| Pcyox1        | 1688.976942 | 0.604299167  | 6.15E-08 | 7.79E-06    |
| Igf2bp2       | 86.00770996 | -1.329133857 | 6.37E-08 | 7.99E-06    |
| Arl4c         | 259.6423166 | 0.896854055  | 8.84E-08 | 1.09E-05    |
| Ucp3          | 227.5470412 | -0.848031045 | 8.87E-08 | 1.09E-05    |
| Acot1         | 123.649609  | 1.261405632  | 1.14E-07 | 1.39E-05    |
| Txnip         | 3542.334356 | -0.476189429 | 1.48E-07 | 1.79E-05    |
| Phlda1        | 921.0941966 | 0.636644884  | 1.50E-07 | 1.79E-05    |
| Fpr1          | 479.0939733 | -0.713346679 | 2.61E-07 | 3.09E-05    |
| Fyco1         | 690.1736896 | -0.603998029 | 2.81E-07 | 3.30E-05    |
| Tgif1         | 291.562229  | 0.761008129  | 2.86E-07 | 3.32E-05    |
| 3110021N24Rik | 72.35619407 | -1.464073591 | 3.35E-07 | 3.86E-05    |
| Coro6         | 318.8380099 | -0.867479579 | 3.86E-07 | 4.41E-05    |
| Marco         | 2230.362333 | 0.61682057   | 4.61E-07 | 5.18E-05    |
| Nr4a1         | 2097.167341 | 0.540600236  | 4.61E-07 | 5.18E-05    |
| Igf2bp3       | 89.60033172 | 1.243891658  | 4.86E-07 | 5.40E-05    |
| Krt79         | 866.8925953 | -0.638186232 | 5.14E-07 | 5.63E-05    |
| Neat1         | 14443.73896 | 0.467485747  | 5.15E-07 | 5.63E-05    |
| Ccl9          | 208.5783701 | 1.055447629  | 5.87E-07 | 6.36E-05    |
| Txnrd1        | 780.7458267 | 0.584603809  | 6.00E-07 | 6.45E-05    |
| Slc1a3        | 28.09068579 | 2.339751833  | 6.17E-07 | 6.53E-05    |
| Sash1         | 385.4242896 | 0.754563768  | 6.17E-07 | 6.53E-05    |
| Tbc1d4        | 336.0515907 | 0.69725476   | 6.56E-07 | 6.88E-05    |
| Gm20594       | 54.03905991 | 1.830136024  | 7.08E-07 | 7.37E-05    |
| Tsc22d3       | 356.6406828 | -0.845749947 | 7.47E-07 | 7.71E-05    |
| Litaf         | 716.5335998 | 0.609878793  | 7.86E-07 | 8.02E-05    |
| Entpd3        | 9.220204965 | 6.686189198  | 7.95E-07 | 8.02E-05    |
| Cldn1         | 149.1920131 | -1.008611632 | 7.96E-07 | 8.02E-05    |
| Eps8          | 357.5540167 | 0.918068077  | 8.05E-07 | 8.05E-05    |
| Plxdc2        | 458.8926517 | 0.63860327   | 8.66E-07 | 8.59E-05    |
| Lyz2          | 128.6052381 | -0.981284541 | 8.77E-07 | 8.63E-05    |
| Ier3          | 79.69983921 | 1.403456136  | 8.89E-07 | 8.68E-05    |
| Serpib6a      | 498.4239313 | 0.625330778  | 9.12E-07 | 8.84E-05    |
| Slc24a1       | 101.7891609 | 1.293573604  | 1.33E-06 | 0.000127618 |
| Zfand2a       | 529.6280276 | 0.587966485  | 1.65E-06 | 0.000157707 |
| Nrp2          | 939.8479564 | 0.532396532  | 1.83E-06 | 0.000173182 |
| Actn1         | 1806.737178 | 0.543393289  | 1.98E-06 | 0.00018654  |
| Apoe          | 4909.018788 | 2.420389654  | 2.00E-06 | 0.00018654  |
| Nfkbia        | 1186.616459 | 0.747834568  | 2.02E-06 | 0.000187201 |
| Cd14          | 779.8311648 | 0.669841391  | 2.31E-06 | 0.0002127   |
| Cotl1         | 3672.085248 | 0.51632119   | 2.53E-06 | 0.000231159 |
| Sipa1l1       | 297.4029298 | -0.746272557 | 2.77E-06 | 0.00025111  |
| Adamtsl4      | 413.5652488 | 0.684812959  | 2.97E-06 | 0.000267209 |
| Erdr1         | 783.3033438 | 0.753832984  | 3.47E-06 | 0.000310692 |
| Lpl           | 6681.353309 | 0.444940445  | 3.69E-06 | 0.000327675 |

|               |             |              |          |             |
|---------------|-------------|--------------|----------|-------------|
| Wls           | 212.6316189 | 0.749966052  | 4.02E-06 | 0.000354532 |
| Sik1          | 409.3057693 | -0.735315869 | 4.07E-06 | 0.000356377 |
| Cd74          | 5659.705172 | -0.622952183 | 4.68E-06 | 0.000407681 |
| Mapkapk2      | 1090.271126 | 0.575083271  | 5.16E-06 | 0.000445679 |
| Srxn1         | 107.5309642 | 0.978873043  | 5.67E-06 | 0.000486813 |
| Chil3         | 14165.15018 | -0.424253727 | 5.77E-06 | 0.00049202  |
| 0610040F04Rik | 257.9232065 | 0.731154249  | 6.65E-06 | 0.000563425 |
| Clec4d        | 64.18102688 | 1.319448502  | 6.71E-06 | 0.00056442  |
| Jag1          | 271.1004318 | 0.653415816  | 7.25E-06 | 0.000606015 |
| Trem1         | 212.4101691 | 0.762571196  | 7.30E-06 | 0.000606571 |
| Cdk5r1        | 13.87909558 | 3.29108157   | 7.35E-06 | 0.000606571 |
| Ptprs         | 245.2522417 | -0.718293345 | 7.98E-06 | 0.000654876 |
| Ptgs1         | 78.849922   | 1.116081385  | 8.83E-06 | 0.000719956 |
| Gm15441       | 2209.181458 | -0.41230482  | 9.03E-06 | 0.000731053 |
| Slc7a8        | 200.6375249 | 0.735990928  | 9.83E-06 | 0.000787569 |
| Cdkn1a        | 679.8403052 | 0.58894518   | 9.85E-06 | 0.000787569 |
| Lasp1         | 891.6634593 | 0.49370381   | 1.09E-05 | 0.000870208 |
| Abcb1b        | 34.35035795 | 1.698627872  | 1.13E-05 | 0.000896119 |
| Ii10          | 34.4959916  | 1.668922523  | 1.15E-05 | 0.00089883  |
| Hmgn5         | 332.7039204 | 0.658771368  | 1.23E-05 | 0.000961721 |
| Ninj1         | 35.02584166 | 1.600827348  | 1.31E-05 | 0.00101436  |
| Apoc1         | 16.22639691 | 2.64116069   | 1.35E-05 | 0.001040605 |
| Rdh5          | 27.83724647 | 1.898492866  | 1.38E-05 | 0.001059641 |
| Rell1         | 98.43404154 | 1.072780508  | 1.44E-05 | 0.001097751 |
| Acpp          | 16.06504539 | 2.990074346  | 1.48E-05 | 0.001121801 |
| Tm7sf3        | 169.0371384 | 0.786585156  | 1.59E-05 | 0.001199149 |
| Cacfd1        | 89.98791436 | 1.027087059  | 1.70E-05 | 0.001271583 |
| Cebpb         | 6097.574947 | -0.450308288 | 1.75E-05 | 0.00130262  |
| Ffar2         | 105.9379521 | 1.012077214  | 1.81E-05 | 0.001336221 |
| Ccbe1         | 61.75211465 | 1.192439028  | 1.91E-05 | 0.001405926 |
| Ccdc146       | 60.2305921  | 1.178609872  | 1.99E-05 | 0.001452469 |
| Hmox1         | 501.7459331 | 0.568465048  | 2.03E-05 | 0.001476942 |
| Clmn          | 725.6330544 | -0.4847814   | 2.24E-05 | 0.001620711 |
| Fabp1         | 1096.745037 | 0.536292726  | 2.36E-05 | 0.001693054 |
| Bzw2          | 437.3093617 | 0.593439429  | 2.59E-05 | 0.001850099 |
| Zbtb16        | 124.5585107 | -1.097237491 | 2.81E-05 | 0.001996106 |
| Parvb         | 332.1899122 | 0.696139733  | 2.87E-05 | 0.002024558 |
| Bzrap1        | 78.97894037 | 1.076650942  | 2.88E-05 | 0.002024558 |
| Nr4a2         | 407.5035079 | 0.614907814  | 2.95E-05 | 0.002061122 |
| 1600023N17Rik | 10.32235074 | 3.905123373  | 3.18E-05 | 0.002211057 |
| Ank           | 100.8286849 | 0.910481977  | 3.44E-05 | 0.002377611 |
| Kcnn4         | 51.95970954 | 1.293046657  | 3.63E-05 | 0.002496336 |
| Lgals9        | 188.9281276 | 0.718193658  | 3.74E-05 | 0.002540122 |
| Alcam         | 289.8796527 | 0.634518915  | 3.75E-05 | 0.002540122 |
| Rps14         | 815.1968507 | -0.603771229 | 3.75E-05 | 0.002540122 |
| Klra2         | 339.807746  | -0.685147181 | 3.79E-05 | 0.002550652 |
| Krt80         | 130.5639358 | -0.845651545 | 3.87E-05 | 0.002589878 |
| Ccdc88c       | 1281.493528 | -0.450929261 | 3.94E-05 | 0.00262645  |
| Rpph1         | 60940.42194 | -0.585629774 | 4.08E-05 | 0.002707056 |



|               |             |              |             |             |
|---------------|-------------|--------------|-------------|-------------|
| Lrp12         | 1028.93643  | 0.471408046  | 4.25E-05    | 0.002801442 |
| St6gal1       | 217.6639944 | 0.669836136  | 4.47E-05    | 0.00293451  |
| Clec4e        | 143.6062051 | 0.877935039  | 4.55E-05    | 0.002969999 |
| Tanc2         | 325.6751725 | -0.633171518 | 4.61E-05    | 0.002983924 |
| Lrrc27        | 12.4439706  | 2.751540205  | 4.62E-05    | 0.002983924 |
| lfrd1         | 984.1896008 | 0.494020699  | 4.80E-05    | 0.003089122 |
| Plcl1         | 44.77649162 | -1.456237475 | 4.89E-05    | 0.003129207 |
| Cyth4         | 1098.46105  | 0.582900832  | 5.32E-05    | 0.003383755 |
| Mafb          | 386.3813099 | 0.627584199  | 5.70E-05    | 0.003611907 |
| Sema6d        | 309.3616818 | -0.606930342 | 5.90E-05    | 0.00371673  |
| Itgae         | 259.7459104 | -0.679975172 | 5.94E-05    | 0.003726005 |
| Fcrls         | 35.76447264 | 1.458977399  | 6.09E-05    | 0.003799564 |
| Csf1          | 50.01797768 | 1.214861164  | 6.28E-05    | 0.003898025 |
| Prickle2      | 440.3571023 | 0.5738612    | 6.58E-05    | 0.004065109 |
| Cpeb1         | 14.21117436 | 2.644941802  | 6.63E-05    | 0.004080776 |
| H2-Aa         | 1332.978874 | -0.507432356 | 6.67E-05    | 0.004084236 |
| Cytip         | 2431.422649 | -0.428572454 | 7.26E-05    | 0.004425191 |
| Dusp6         | 449.2918902 | 0.523289776  | 7.31E-05    | 0.004433338 |
| Tmem134       | 177.5759284 | -0.731986262 | 7.35E-05    | 0.004435806 |
| Gbp8          | 119.2627488 | -1.019025913 | 7.38E-05    | 0.004435806 |
| Il1b          | 510.7890324 | 0.643616127  | 7.58E-05    | 0.004530324 |
| Galnt3        | 374.1719625 | 0.635477512  | 7.79E-05    | 0.004626376 |
| Epcam         | 76.14584656 | -1.015550368 | 7.81E-05    | 0.004626376 |
| Cd33          | 596.5262757 | 0.519687728  | 7.88E-05    | 0.004648245 |
| Dlec1         | 185.3959594 | 0.889374451  | 8.00E-05    | 0.004696507 |
| Espn          | 32.18806535 | -1.48825443  | 8.32E-05    | 0.004861208 |
| Fyn           | 350.5554485 | -0.580014479 | 8.77E-05    | 0.0050984   |
| Prdm8         | 17.12513988 | 2.411416412  | 8.87E-05    | 0.005134235 |
| Acot2         | 98.67509086 | 0.900107366  | 9.50E-05    | 0.005476562 |
| Kdm5b         | 125.9348982 | -0.797250331 | 9.55E-05    | 0.005478777 |
| Sh3pxd2b      | 1174.287446 | 0.465933001  | 0.000101031 | 0.005770957 |
| Ccr1l1        | 7.043357189 | 5.308889711  | 0.000107891 | 0.006135388 |
| Foxp4         | 89.86123491 | -1.027129535 | 0.000110475 | 0.006192311 |
| Dgkz          | 1001.113121 | 0.428131364  | 0.000110492 | 0.006192311 |
| 1110007C09Rik | 90.69603494 | 0.904911019  | 0.000110557 | 0.006192311 |
| Ccdc171       | 163.9414071 | -0.713329961 | 0.000110967 | 0.006192311 |
| Src           | 61.61819236 | 1.249085548  | 0.000111312 | 0.006192311 |
| Pim1          | 1198.503219 | 0.540569213  | 0.000112474 | 0.006203722 |
| Emb           | 95.17720139 | -0.887790555 | 0.000112486 | 0.006203722 |
| Lrrc3         | 22.881743   | -1.814075425 | 0.000115219 | 0.006327134 |
| Proz          | 45.01793228 | 1.282777076  | 0.000124496 | 0.006807355 |
| Mamdc2        | 158.2787212 | 0.770638421  | 0.00012822  | 0.006981195 |
| Cbfa2t3       | 552.033971  | -0.565757983 | 0.000132708 | 0.007194912 |
| Chsy1         | 426.6412471 | -0.513057945 | 0.00013765  | 0.007431361 |
| Tmem38b       | 200.4700771 | 0.706924449  | 0.000145074 | 0.007799246 |
| Oxct1         | 355.0553127 | 0.549568275  | 0.000147339 | 0.007887875 |
| Fam71a        | 57.77122141 | 1.132219227  | 0.000149531 | 0.007971874 |
| H2-Eb1        | 1660.933951 | -0.62199252  | 0.000163098 | 0.008659076 |
| Ppp1r15a      | 510.3925743 | 0.559217397  | 0.000171967 | 0.009092232 |

|               |             |              |             |             |
|---------------|-------------|--------------|-------------|-------------|
| Lox           | 13.5103631  | 2.302541148  | 0.000176809 | 0.009309734 |
| Ptch2         | 35.31781963 | 1.361881911  | 0.000178403 | 0.009355166 |
| Cd68          | 1840.069369 | 0.419873659  | 0.000181691 | 0.009488744 |
| Cdk6          | 503.9545375 | -0.482820936 | 0.000183775 | 0.009558519 |
| Hsd3b7        | 550.0413267 | -0.450585128 | 0.000192353 | 0.009964212 |
| Olfr112       | 8.312815631 | 3.544655309  | 0.000195823 | 0.010103038 |
| Wfdc17        | 36.64710237 | 1.416798912  | 0.00019902  | 0.010226734 |
| Tsku          | 11.3451939  | 2.733784378  | 0.000205015 | 0.01049267  |
| Rasgrp1       | 116.8423082 | 0.838892801  | 0.000231467 | 0.011799263 |
| Slc39a2       | 302.3835901 | 0.566496497  | 0.000242523 | 0.01231383  |
| Cpeb4         | 632.3829683 | 0.53300991   | 0.00024576  | 0.012428839 |
| Clec2d        | 453.5744812 | -0.519977243 | 0.000251503 | 0.012669239 |
| 4930473A02Rik | 184.3482691 | 0.66591988   | 0.000254094 | 0.01274953  |
| Gla           | 152.3757473 | 0.682232757  | 0.000263613 | 0.013127031 |
| Csrnp1        | 311.8614382 | 0.686980525  | 0.000263669 | 0.013127031 |
| Cib2          | 87.63106053 | -0.935756937 | 0.000265517 | 0.013167782 |
| Iqgap2        | 685.9360286 | -0.428969316 | 0.000266705 | 0.013175645 |
| Mki67         | 1112.355307 | 0.480971413  | 0.000268752 | 0.013225706 |
| Hilpda        | 89.64443688 | 0.976924214  | 0.00027045  | 0.013258248 |
| Vstm2a        | 167.0680884 | 0.730577319  | 0.000273869 | 0.013374646 |
| Atp1b3        | 655.199227  | 0.485736946  | 0.000285069 | 0.01386865  |
| Myo1e         | 971.1559698 | 0.39219273   | 0.000292754 | 0.014153235 |
| Igflr1        | 68.85058464 | -1.136401301 | 0.000293131 | 0.014153235 |
| Arpc4         | 785.3822666 | 0.4326514    | 0.000294815 | 0.014181051 |
| Npas2         | 3.895578835 | 5.445216553  | 0.000299474 | NA          |
| Mdm2          | 428.4339847 | 0.468153457  | 0.000306601 | 0.014692721 |
| Htra3         | 37.49206873 | 1.277754223  | 0.000309749 | 0.014788187 |
| Slc27a1       | 268.656981  | 0.736038088  | 0.000321466 | 0.015290548 |
| Mlph          | 117.2861573 | 0.929010195  | 0.000326595 | 0.015476954 |
| Mvb12b        | 184.1089092 | 0.655260011  | 0.000331232 | 0.015638805 |
| Slc2a1        | 105.230647  | 0.811612982  | 0.000337461 | 0.015874292 |
| Ctsa          | 2748.926105 | 0.384920727  | 0.00033992  | 0.015931416 |
| Zfp276        | 281.3218829 | -0.554143088 | 0.000369524 | 0.017247095 |
| Gramd1b       | 103.6375553 | 0.75746269   | 0.000370688 | 0.017247095 |
| H2-Ab1        | 2881.25436  | -0.451514751 | 0.000374556 | 0.017363923 |
| Rhoc          | 210.493282  | -0.635579159 | 0.00037702  | 0.017383355 |
| Psm8          | 487.7707772 | 0.478607112  | 0.000377692 | 0.017383355 |
| Slfn10-ps     | 18.36655857 | 1.80556201   | 0.000382786 | 0.017554626 |
| Ciita         | 379.1751857 | -0.640852929 | 0.000387091 | 0.017688655 |
| Anxa4         | 841.8530665 | 0.423663528  | 0.000388721 | 0.017699929 |
| Ppp1r9a       | 164.8353005 | -0.707074922 | 0.000402402 | 0.01825794  |
| Net1          | 2027.499869 | -0.354563298 | 0.000406986 | 0.018400651 |
| Gabbr1        | 111.7546386 | -0.788862902 | 0.000415187 | 0.018684563 |
| Map6          | 105.3595942 | 0.870987073  | 0.000416186 | 0.018684563 |
| Med22         | 175.3436659 | 0.614862682  | 0.000440656 | 0.019713952 |
| Penk          | 18.24983499 | 1.863996036  | 0.000446605 | 0.019857609 |
| Rab7          | 1321.828316 | 0.372611943  | 0.000446971 | 0.019857609 |
| E2f2          | 167.9906152 | 0.671524624  | 0.000453309 | 0.020069494 |
| Pfn1          | 2618.378905 | 0.359665538  | 0.000460394 | 0.020312916 |

|               |             |              |             |             |
|---------------|-------------|--------------|-------------|-------------|
| Egr2          | 1170.587697 | 0.445467309  | 0.000467181 | 0.020541516 |
| Abl2          | 493.4540127 | 0.453091104  | 0.000470901 | 0.020634174 |
| 3010026O09Rik | 60.694734   | 1.005113287  | 0.00047449  | 0.020712704 |
| Elovl6        | 68.65540993 | -1.049721031 | 0.000475931 | 0.020712704 |
| Fam19a5       | 3.544247918 | 5.309715027  | 0.000482324 | NA          |
| Tmc8          | 31.51526076 | -1.32115731  | 0.000496338 | 0.021527626 |
| Slc3a2        | 1109.473372 | 0.370440789  | 0.000514243 | 0.022166387 |
| Zfyve9        | 52.3509639  | -1.12194888  | 0.00051453  | 0.022166387 |
| Lpcat2        | 111.272692  | 0.767400635  | 0.000536539 | 0.02301827  |
| Rsrp1         | 1438.365083 | -0.383145928 | 0.000537903 | 0.02301827  |
| Bhlhe41       | 1137.881305 | 0.347321663  | 0.000548392 | 0.023388914 |
| Tmem132a      | 991.1065227 | 0.471901271  | 0.000562229 | 0.02389939  |
| Rai14         | 144.7464774 | 1.733305119  | 0.000593027 | 0.025096362 |
| Gsn           | 1238.228863 | 0.368239978  | 0.00059431  | 0.025096362 |
| Ptgr1         | 46.75751065 | 1.083050787  | 0.00059787  | 0.025142422 |
| Rasgef1b      | 1085.121666 | 0.389009918  | 0.000599331 | 0.025142422 |
| Snord57       | 33.87830282 | 1.664416001  | 0.000601528 | 0.025152117 |
| Spag11b       | 40.00371192 | 1.30821324   | 0.000607073 | 0.02530131  |
| Hr            | 139.9534635 | -0.745713668 | 0.000624461 | 0.025941504 |
| Zak           | 296.8725734 | 0.550541147  | 0.000629338 | 0.026059494 |
| Adgrg1        | 59.27104689 | -1.075499243 | 0.000638494 | 0.026353324 |
| Gpr3          | 9.409023595 | 2.632733476  | 0.000646701 | 0.026606245 |
| Adam8         | 171.0269833 | -0.766320503 | 0.000653841 | 0.026813756 |
| 8430408G22Rik | 255.9338078 | -0.55825149  | 0.000689988 | 0.028205749 |
| Fnip2         | 918.9524366 | 0.422308104  | 0.000697003 | 0.028342396 |
| Tbc1d10a      | 173.073052  | -0.661076809 | 0.000697761 | 0.028342396 |
| Ccl5          | 31.53624831 | -1.355211057 | 0.000707177 | 0.028633968 |
| Cidec         | 612.6633049 | -0.500708442 | 0.000734686 | 0.02965396  |
| Osbpl3        | 246.4179787 | 0.562089531  | 0.000742798 | 0.029887094 |
| Erc2          | 172.1933594 | -0.640144458 | 0.000749314 | 0.030054778 |
| F630028O10Rik | 86.16366377 | -0.987248143 | 0.000776898 | 0.031063773 |
| Ttc21a        | 12.87911386 | 2.323164635  | 0.000785882 | 0.031325129 |
| Frk           | 42.81183939 | 1.124036531  | 0.000793922 | 0.031547311 |
| Arhgap26      | 1166.632498 | -0.358232229 | 0.000827159 | 0.032766263 |
| Adcy6         | 123.3565489 | -0.778622313 | 0.000837557 | 0.033075739 |
| Sgk1          | 3285.100341 | 0.315255074  | 0.000855258 | 0.033670846 |
| Slc29a1       | 469.7453763 | 0.447682366  | 0.000859566 | 0.033730707 |
| Rnf128        | 19.3914454  | 1.746062627  | 0.000862051 | 0.033730707 |
| Trim24        | 120.1509654 | -0.697731283 | 0.000868654 | 0.033885442 |
| Sestd1        | 113.613238  | 0.693217361  | 0.000885614 | 0.034442059 |
| Fblim1        | 166.6179094 | 0.665857385  | 0.000892345 | 0.034598654 |
| B4galt1       | 591.698331  | 0.447513401  | 0.000930238 | 0.035958892 |
| 4930599N23Rik | 99.3853517  | 0.738570753  | 0.000939396 | 0.036203538 |
| Pid1          | 228.3722588 | 0.535604912  | 0.000992652 | 0.038088322 |
| Timp2         | 446.288024  | 0.509348373  | 0.000994256 | 0.038088322 |
| Clec4n        | 822.6119087 | 0.413605317  | 0.000997871 | 0.038112726 |
| Hip1r         | 277.7114843 | -0.530685282 | 0.001004355 | 0.038246188 |
| Gatm          | 57.62506657 | -1.040711179 | 0.001027189 | 0.038999648 |
| Preli2        | 18.12879584 | -1.637414916 | 0.00104136  | 0.0394207   |

|               |             |              |             |             |
|---------------|-------------|--------------|-------------|-------------|
| Rmi1          | 330.5014138 | 0.530182493  | 0.001100231 | 0.041526413 |
| Herpud1       | 392.8477209 | -0.448880735 | 0.001146955 | 0.043162628 |
| Rbpj          | 682.2958282 | 0.429436857  | 0.001159579 | 0.043509704 |
| Clec1b        | 44.27619145 | 1.104420765  | 0.001187861 | 0.044440593 |
| Plbd1         | 415.6287602 | -0.472488955 | 0.00119344  | 0.044519129 |
| Ctss          | 9956.250544 | -0.282064695 | 0.001210794 | 0.04503522  |
| AW112010      | 47.71180856 | -1.065171917 | 0.001224945 | 0.045429482 |
| Lims1         | 333.2885545 | 0.446729758  | 0.001240148 | 0.045860379 |
| 4931440P22Rik | 112.9634877 | 0.664044743  | 0.001261264 | 0.046506847 |
| Nfe2l2        | 867.8763978 | 0.384967719  | 0.001342517 | 0.049307812 |
| Fam212a       | 40.37336904 | -1.093961902 | 0.001344934 | 0.049307812 |
| Bcl2a1b       | 431.5062783 | 0.428964358  | 0.00136236  | 0.049803985 |

**Kramer et al. Supplemental Table 2**

UP regulated in Lyz2-Cre+/+YFP+/-Ctnnb1Ex3Δ/wt relative to Lyz2-Cre+/+YFP+/-

| <u>NAME</u>                                | <u>SIZE</u> | <u>ES</u>  | <u>NES</u> | <u>NOM p-val</u> | <u>FDR q-val</u> | <u>FWER p-val</u> |
|--------------------------------------------|-------------|------------|------------|------------------|------------------|-------------------|
| HALLMARK_TNFA_SIGNALING_VIA_NFKB           | 189         | 0.5228427  | 2.384836   | 0                | 0                | 0                 |
| HALLMARK_INFLAMMATORY_RESPONSE             | 175         | 0.4649009  | 2.0897958  | 0                | 0                | 0                 |
| HALLMARK_COMPLEMENT                        | 171         | 0.391839   | 1.7815962  | 0                | 0.006942031      | 0.011             |
| HALLMARK_IL2_STAT5_SIGNALING               | 191         | 0.38917518 | 1.7684631  | 0                | 0.006306523      | 0.013             |
| HALLMARK_KRAS_SIGNALING_UP                 | 172         | 0.37779653 | 1.6864816  | 0                | 0.012771722      | 0.032             |
| HALLMARK_P53_PATHWAY                       | 189         | 0.36350355 | 1.6497709  | 0                | 0.018496457      | 0.056             |
| HALLMARK_APOPTOSIS                         | 148         | 0.3675941  | 1.6284434  | 0                | 0.019855699      | 0.069             |
| HALLMARK_EPITHELIAL_MESENCHYMAL_TRANSITION | 166         | 0.35301563 | 1.5755601  | 0.003076923      | 0.030838158      | 0.118             |
| HALLMARK_COAGULATION                       | 104         | 0.37193736 | 1.5353906  | 0.007425743      | 0.036614947      | 0.151             |
| HALLMARK_ESTROGEN_RESPONSE_LATE            | 165         | 0.29888755 | 1.3505424  | 0.011142061      | 0.12602551       | 0.53              |
| HALLMARK_HYPOXIA                           | 171         | 0.31036854 | 1.3913258  | 0.012539185      | 0.09488032       | 0.406             |
| HALLMARK_IL6_JAK_STAT3_SIGNALING           | 79          | 0.380484   | 1.502002   | 0.013736264      | 0.043594502      | 0.199             |
| HALLMARK_ESTROGEN_RESPONSE_EARLY           | 172         | 0.29139036 | 1.301258   | 0.033994336      | 0.14059843       | 0.666             |
| HALLMARK_XENOBIOTIC_METABOLISM             | 160         | 0.30243286 | 1.3372833  | 0.0359116        | 0.12932126       | 0.566             |
| HALLMARK_CHOLESTEROL_HOMEOSTASIS           | 69          | 0.34684932 | 1.3342023  | 0.05             | 0.12361256       | 0.572             |

**Kramer et al. Supplemental Table 3**

UP regulated in Lyz2-Cre+/+YFP+/-Ctnnb1Ex3Δ/wt relative to Lyz2-Cre+/+YFP+/-

| NAME                                                      | SIZE | ES         | NES       | NOM p-val | FDR q-val   | FWER p-val |
|-----------------------------------------------------------|------|------------|-----------|-----------|-------------|------------|
| GOBP_POSITIVE_REGULATION_OF_LIPID_STORAGE                 | 22   | 0.7142092  | 2.195236  | 0         | 0.038392685 | 0.024      |
| GOBP_REGULATION_OF_LIPID_STORAGE                          | 47   | 0.60589755 | 2.1655    | 0         | 0.032107066 | 0.04       |
| GOBP_PROTEIN_LIPID_COMPLEX_SUBUNIT_ORGANIZATION           | 37   | 0.63082993 | 2.161361  | 0         | 0.021929035 | 0.041      |
| GOBP_REGULATION_OF_PLASMA_LIPOPROTEIN_PARTICLE_LEVELS     | 66   | 0.5652764  | 2.153499  | 0         | 0.019656403 | 0.049      |
| GOBP_LIPID_STORAGE                                        | 74   | 0.5404545  | 2.1476483 | 0         | 0.017950531 | 0.056      |
| GOBP_INTERLEUKIN_1_PRODUCTION                             | 85   | 0.53418404 | 2.1451633 | 0         | 0.015495149 | 0.058      |
| GOBP_NEGATIVE_REGULATION_OF_INTERLEUKIN_1_BETA_PRODUCTION | 20   | 0.70793134 | 2.109485  | 0         | 0.024985926 | 0.107      |
| GOBP_REGULATION_OF_HETEROTYPIC_CELL_CELL_ADHESION         | 17   | 0.7473678  | 2.1032362 | 0         | 0.023430523 | 0.115      |
| GOBP GRANULOCYTE CHEMOTAXIS                               | 87   | 0.5156702  | 2.099306  | 0         | 0.022272365 | 0.123      |
| GOBP_CELLULAR_RESPONSE_TO_FATTY_ACID                      | 27   | 0.6596066  | 2.0926316 | 0         | 0.022108605 | 0.135      |
| GOBP_NEUTROPHIL_CHEMOTAXIS                                | 73   | 0.5413211  | 2.084956  | 0         | 0.022296311 | 0.149      |
| GOBP_INTERLEUKIN_1_BETA_PRODUCTION                        | 73   | 0.53311205 | 2.083842  | 0         | 0.020839546 | 0.151      |
| GOBP_NEGATIVE_REGULATION_OF_INTERLEUKIN_1_PRODUCTION      | 25   | 0.6686165  | 2.0820417 | 0         | 0.01997572  | 0.155      |
| GOBP_HUMORAL_IMMUNE_RESPONSE                              | 122  | 0.48140016 | 2.0662014 | 0         | 0.0226779   | 0.184      |
| GOBP_TOLERANCE_INDUCTION                                  | 22   | 0.6735145  | 2.0622284 | 0         | 0.02234059  | 0.192      |
| GOBP_POSITIVE_REGULATION_OF_LIPID_LOCALIZATION            | 84   | 0.51793027 | 2.057979  | 0         | 0.02244735  | 0.203      |
| GOBP_POSITIVE_REGULATION_OF_MACROPHAGE_MIGRATION          | 21   | 0.69370306 | 2.0435889 | 0         | 0.026309734 | 0.246      |
| GOBP_RESPONSE_TO_FATTY_ACID                               | 45   | 0.5751703  | 2.0326958 | 0         | 0.02849401  | 0.281      |
| GOBP_REGULATION_OF_BEHAVIOR                               | 33   | 0.6074947  | 2.0325875 | 0         | 0.026994329 | 0.281      |
| GOBP_AMYLOID_BETA_CLEARANCE                               | 33   | 0.60367876 | 2.016608  | 0         | 0.031797167 | 0.337      |
| GOBP_REGULATION_OF_LEUKOCYTE_DEGRANULATION                | 35   | 0.5936506  | 2.0141687 | 0         | 0.031356    | 0.346      |
| GOBP_CELLULAR_RESPONSE_TO_MOLECULE_OF_BACTERIAL_ORIGIN    | 158  | 0.45164892 | 2.0049267 | 0         | 0.03321516  | 0.373      |
| GOBP_NEUTROPHIL_MIGRATION                                 | 87   | 0.4910698  | 1.996466  | 0         | 0.03559136  | 0.402      |
| GOBP GRANULOCYTE MIGRATION                                | 103  | 0.4845869  | 1.991921  | 0         | 0.03558837  | 0.414      |
| GOBP_MACROPHAGE_CHEMOTAXIS                                | 30   | 0.61058    | 1.9879568 | 0         | 0.035635285 | 0.43       |
| GOBP_CHEMOKINE_PRODUCTION                                 | 72   | 0.50569326 | 1.9827901 | 0         | 0.035762142 | 0.446      |
| GOBP_REGULATION_OF_MEMBRANE_INVAGINATION                  | 15   | 0.7247144  | 1.972934  | 0         | 0.038764838 | 0.487      |
| GOBP_MEMBRANE_INVAGINATION                                | 59   | 0.52217704 | 1.9694482 | 0         | 0.03869368  | 0.494      |
| GOBP_REGULATION_OF_AMYLOID_BETA_CLEARANCE                 | 15   | 0.6974186  | 1.9514387 | 0         | 0.04523159  | 0.563      |
| GOBP_POSITIVE_REGULATION_OF_CHOLESTEROL_EFFLUX            | 17   | 0.69811726 | 1.949814  | 0         | 0.04464855  | 0.568      |
| GOBP_CELLULAR_RESPONSE_TO_BIOTIC_STIMULUS                 | 181  | 0.4274607  | 1.9492502 | 0         | 0.043400977 | 0.569      |
| GOBP_POSITIVE_REGULATION_OF_CALCIIUM_MEDIATED_SIGNALING   | 22   | 0.64697355 | 1.9319143 | 0         | 0.048236128 | 0.635      |
| GOBP_LIPOPOLYSACCHARIDE_MEDIATED_SIGNALING_PATHWAY        | 52   | 0.53540415 | 1.923688  | 0         | 0.050501592 | 0.664      |
| GOBP_CHOLESTEROL_EFFLUX                                   | 38   | 0.5527135  | 1.9178114 | 0         | 0.05128782  | 0.688      |
| GOBP_OOGENESIS                                            | 51   | 0.53319746 | 1.9137099 | 0         | 0.05237539  | 0.708      |

|                                                                 |     |            |           |   |             |       |
|-----------------------------------------------------------------|-----|------------|-----------|---|-------------|-------|
| GOBP_PROTEIN_LIPID_COMPLEX_ASSEMBLY                             | 27  | 0.60371965 | 1.9123011 | 0 | 0.051741842 | 0.714 |
| GOBP_REGULATION_OF_BONE_MINERALIZATION                          | 54  | 0.52416265 | 1.9112884 | 0 | 0.05134138  | 0.719 |
| GOBP_POSITIVE_REGULATION_OF_INFLAMMATORY_RESPONSE               | 97  | 0.45988822 | 1.9062433 | 0 | 0.0519487   | 0.745 |
| GOBP_REGULATION_OF_MEMBRANE_PROTEIN_ECTODOMAIN_PROTEOLYSIS      | 22  | 0.6289227  | 1.9025965 | 0 | 0.052996513 | 0.763 |
| GOBP_REGULATION_OF_PHAGOCYTOSIS                                 | 77  | 0.47859046 | 1.8882126 | 0 | 0.058024332 | 0.811 |
| GOBP_TUMOR_NECROSIS_FACTOR_SUPERFAMILY_CYTOKINE_PRODUCTION      | 125 | 0.43808243 | 1.8854007 | 0 | 0.058389254 | 0.817 |
| GOBP_POSITIVE_REGULATION_OF_PHAGOCYTOSIS                        | 54  | 0.5089912  | 1.8841945 | 0 | 0.058011796 | 0.82  |
| GOBP_BONE_MINERALIZATION                                        | 83  | 0.4707862  | 1.879688  | 0 | 0.05957849  | 0.841 |
| GOBP_REGULATION_OF_LEUKOCYTE_CHEMOTAXIS                         | 96  | 0.44335753 | 1.8694031 | 0 | 0.059242494 | 0.869 |
| GOBP_FEMALE_GAMETE_GENERATION                                   | 85  | 0.46600312 | 1.8662187 | 0 | 0.06038782  | 0.877 |
| GOBP_VASCULAR_ENDOTHELIAL_GROWTH_FACTOR_PRODUCTION              | 35  | 0.5564537  | 1.8633057 | 0 | 0.06108908  | 0.885 |
| GOBP_POSITIVE_REGULATION_OF_INTERLEUKIN_1_PRODUCTION            | 46  | 0.52770305 | 1.8603383 | 0 | 0.062071137 | 0.891 |
| GOBP_PLASMA_LIPOPROTEIN_PARTICLE_CLEARANCE                      | 45  | 0.52530813 | 1.8543202 | 0 | 0.06368413  | 0.903 |
| GOBP_REGULATION_OF_ANION_TRANSMEMBRANE_TRANSPORT                | 82  | 0.44910264 | 1.844457  | 0 | 0.06693039  | 0.921 |
| GOBP_REGULATION_OF_OSSIFICATION                                 | 82  | 0.45753843 | 1.8442296 | 0 | 0.066098765 | 0.922 |
| GOBP_REGULATION_OF_MONONUCLEAR_CELL_MIGRATION                   | 89  | 0.45200035 | 1.8435569 | 0 | 0.065540776 | 0.923 |
| GOBP_POSITIVE_REGULATION_OF_LEUKOCYTE_MIGRATION                 | 108 | 0.43615618 | 1.8419499 | 0 | 0.0646927   | 0.929 |
| GOBP_POSITIVE_REGULATION_OF_MYELOID_LEUKOCYTE_MEDIATED_IMMUNI   | 16  | 0.65987575 | 1.838017  | 0 | 0.06623854  | 0.932 |
| GOBP_GLIAL_CELL_MIGRATION                                       | 41  | 0.52046454 | 1.8361577 | 0 | 0.066181235 | 0.933 |
| GOBP_NEGATIVE_REGULATION_OF_TUMOR_NECROSIS_FACTOR_SUPERFAMILY   | 46  | 0.50906384 | 1.8340474 | 0 | 0.06545545  | 0.939 |
| GOBP_POSITIVE_REGULATION_OF_NIK_NF_KAPPAB_SIGNALING             | 61  | 0.4868398  | 1.8257877 | 0 | 0.070531845 | 0.954 |
| GOBP_RESPIRATORY_SYSTEM_DEVELOPMENT                             | 154 | 0.40669817 | 1.8161813 | 0 | 0.07312073  | 0.967 |
| GOBP_REGULATION_OF_LIPID_LOCALIZATION                           | 129 | 0.42530516 | 1.8141122 | 0 | 0.07386671  | 0.97  |
| GOBP_MULTICELLULAR_ORGANISMAL_RESPONSE_TO_STRESS                | 37  | 0.51074505 | 1.8118831 | 0 | 0.07457302  | 0.971 |
| GOBP_REGULATION_OF_TISSUE_REMODELING                            | 60  | 0.47717002 | 1.8078079 | 0 | 0.07525903  | 0.971 |
| GOBP_BIOMINERALIZATION                                          | 106 | 0.4325073  | 1.8033198 | 0 | 0.07759553  | 0.973 |
| GOBP_INTERLEUKIN_6_PRODUCTION                                   | 117 | 0.4271417  | 1.8008862 | 0 | 0.07839181  | 0.973 |
| GOBP_RESPONSE_TO_PROGESTERONE                                   | 33  | 0.55218357 | 1.79864   | 0 | 0.07894557  | 0.974 |
| GOBP_POSITIVE_REGULATION_OF_REACTIVE_OXYGEN_SPECIES_METABOLIC_P | 77  | 0.4478671  | 1.7875228 | 0 | 0.08389782  | 0.982 |
| GOBP_MYELOID_LEUKOCYTE_MIGRATION                                | 160 | 0.3998551  | 1.7838552 | 0 | 0.08397873  | 0.985 |
| GOBP_REGULATION_OF_REPRODUCTIVE_PROCESS                         | 100 | 0.42551568 | 1.7688855 | 0 | 0.08854202  | 0.994 |
| GOBP_POSITIVE_REGULATION_OF_EPITHELIAL_TO_MESENCHYMAL_TRANSITIO | 43  | 0.49678436 | 1.7509289 | 0 | 0.09803897  | 0.997 |
| GOBP_RESPONSE_TO_MOLECULE_OF_BACTERIAL_ORIGIN                   | 259 | 0.3665905  | 1.74821   | 0 | 0.09968595  | 0.997 |
| GOBP_ERK1_AND_ERK2_CASCADE                                      | 222 | 0.37461895 | 1.739869  | 0 | 0.104001425 | 0.999 |
| GOBP_POSITIVE_REGULATION_OF_LEUKOCYTE_CHEMOTAXIS                | 73  | 0.44826725 | 1.7285804 | 0 | 0.10589663  | 0.999 |
| GOBP_REGULATION_OF_LEUKOCYTE_MIGRATION                          | 164 | 0.38860035 | 1.7279302 | 0 | 0.1055624   | 0.999 |
| GOBP_POSITIVE_REGULATION_OF_SIGNALING_RECEPTOR_ACTIVITY         | 32  | 0.52055913 | 1.7189786 | 0 | 0.11064549  | 0.999 |
| GOBP_DEFENSE_RESPONSE_TO_BACTERIUM                              | 124 | 0.40100658 | 1.7133186 | 0 | 0.11368226  | 0.999 |

|                                                                |     |            |           |   |             |   |
|----------------------------------------------------------------|-----|------------|-----------|---|-------------|---|
| GOBP_POSITIVE_REGULATION_OF_PROTEIN_TYROSINE_KINASE_ACTIVITY   | 48  | 0.47914562 | 1.7119906 | 0 | 0.11437127  | 1 |
| GOBP_CELL_CHEMOTAXIS                                           | 231 | 0.36126345 | 1.7023201 | 0 | 0.11828239  | 1 |
| GOBP_REGULATION_OF_REACTIVE_OXYGEN_SPECIES_METABOLIC_PROCESS   | 149 | 0.38050663 | 1.6908894 | 0 | 0.12187077  | 1 |
| GOBP_RESPONSE_TO_BACTERIUM                                     | 403 | 0.34294772 | 1.6908519 | 0 | 0.121041246 | 1 |
| GOBP_LEUKOCYTE_MIGRATION                                       | 344 | 0.34419572 | 1.6839863 | 0 | 0.12616333  | 1 |
| GOBP_POSITIVE_REGULATION_OF_INTERLEUKIN_6_PRODUCTION           | 69  | 0.42912984 | 1.6790985 | 0 | 0.12835379  | 1 |
| GOBP_POSITIVE_REGULATION_OF_ERK1_AND_ERK2_CASCADE              | 141 | 0.37943792 | 1.6780508 | 0 | 0.12836133  | 1 |
| GOBP_POSITIVE_REGULATION_OF_CELL_CELL_ADHESION                 | 216 | 0.35448503 | 1.6722785 | 0 | 0.12925264  | 1 |
| GOBP_NEGATIVE_REGULATION_OF_CYTOKINE_PRODUCTION                | 234 | 0.35056418 | 1.6498628 | 0 | 0.14171413  | 1 |
| GOBP_TISSUE_REMODELING                                         | 126 | 0.38093486 | 1.634729  | 0 | 0.14963065  | 1 |
| GOBP_REGULATION_OF_CELL_CELL_ADHESION                          | 337 | 0.33567807 | 1.6311891 | 0 | 0.15025668  | 1 |
| GOBP_POSITIVE_REGULATION_OF_RESPONSE_TO_EXTERNAL_STIMULUS      | 394 | 0.3299016  | 1.6265808 | 0 | 0.15143852  | 1 |
| GOBP_CELLULAR_RESPONSE_TO_LIPID                                | 422 | 0.32562777 | 1.6148168 | 0 | 0.15983064  | 1 |
| GOBP_LIPID_LOCALIZATION                                        | 356 | 0.33206156 | 1.6066504 | 0 | 0.1662874   | 1 |
| GOBP_POSITIVE_REGULATION_OF_DEFENSE_RESPONSE                   | 281 | 0.33428472 | 1.6044168 | 0 | 0.16568688  | 1 |
| GOBP_POSITIVE_REGULATION_OF_CYTOKINE_PRODUCTION                | 344 | 0.32697114 | 1.5919582 | 0 | 0.1737016   | 1 |
| GOBP_REACTIVE_OXYGEN_SPECIES_METABOLIC_PROCESS                 | 206 | 0.3502389  | 1.5916183 | 0 | 0.17330913  | 1 |
| GOBP_POSITIVE_REGULATION_OF_CELL_ACTIVATION                    | 274 | 0.3348376  | 1.5841839 | 0 | 0.17725125  | 1 |
| GOBP_CELLULAR_PROCESS_INVOLVED_IN_REPRODUCTION_IN_MULTICELLULA | 204 | 0.34360477 | 1.5795828 | 0 | 0.17983241  | 1 |
| GOBP_REGULATION_OF_NUCLEAR_DIVISION                            | 118 | 0.3683367  | 1.576123  | 0 | 0.18109098  | 1 |
| GOBP_REGULATION_OF_CELL_ACTIVATION                             | 456 | 0.3128791  | 1.5716729 | 0 | 0.18447194  | 1 |
| GOBP_POSITIVE_REGULATION_OF_LYMPHOCYTE_DIFFERENTIATION         | 84  | 0.39204577 | 1.5685269 | 0 | 0.1857678   | 1 |
| GOBP_MYELOID_LEUKOCYTE_MEDIATED_IMMUNITY                       | 452 | 0.31484875 | 1.5615139 | 0 | 0.18991208  | 1 |
| GOBP_TAXIS                                                     | 469 | 0.30952162 | 1.5467883 | 0 | 0.20036829  | 1 |
| GOBP_LEUKOCYTE_CELL_CELL_ADHESION                              | 287 | 0.32542962 | 1.5394967 | 0 | 0.20409663  | 1 |
| GOBP_MEIOTIC_CELL_CYCLE_PROCESS                                | 128 | 0.35280392 | 1.5131655 | 0 | 0.2208527   | 1 |
| GOBP_MULTICELLULAR_ORGANISMAL_HOMEOSTASIS                      | 381 | 0.30192548 | 1.4886198 | 0 | 0.23168792  | 1 |
| GOBP_RESPONSE_TO_TOXIC_SUBSTANCE                               | 165 | 0.3345242  | 1.4879601 | 0 | 0.23204182  | 1 |
| GOBP_SENSORY_PERCEPTION                                        | 293 | 0.30922642 | 1.4861643 | 0 | 0.23395117  | 1 |
| GOBP_WOUND_HEALING                                             | 414 | 0.29964527 | 1.4820219 | 0 | 0.2382627   | 1 |
| GOBP_REGULATION_OF_PROTEIN_SERINE_THREONINE_KINASE_ACTIVITY    | 408 | 0.29558516 | 1.4749733 | 0 | 0.24298175  | 1 |
| GOBP_ANION_TRANSMEMBRANE_TRANSPORT                             | 378 | 0.2999991  | 1.4677787 | 0 | 0.24633354  | 1 |
| GOBP_POSITIVE_REGULATION_OF_MAPK_CASCADE                       | 390 | 0.29462504 | 1.4609149 | 0 | 0.24850078  | 1 |
| GOBP_RESPONSE_TO_INSULIN                                       | 233 | 0.31049103 | 1.4577286 | 0 | 0.24944885  | 1 |
| GOBP_RESPONSE_TO_PEPTIDE                                       | 413 | 0.29420158 | 1.45691   | 0 | 0.24994168  | 1 |
| GOBP_GLIOGENESIS                                               | 219 | 0.31028184 | 1.4458905 | 0 | 0.25579977  | 1 |
| GOBP_POSITIVE_REGULATION_OF_LOCOMOTION                         | 458 | 0.2844026  | 1.4285363 | 0 | 0.26711762  | 1 |
| GOBP_REGULATION_OF_T_CELL_ACTIVATION                           | 263 | 0.29838976 | 1.426474  | 0 | 0.26726264  | 1 |



|                                                            |     |            |           |             |             |       |
|------------------------------------------------------------|-----|------------|-----------|-------------|-------------|-------|
| GOBP_POSITIVE_REGULATION_OF_SECRETION                      | 205 | 0.31116837 | 1.4262398 | 0           | 0.2670172   | 1     |
| GOBP_POSITIVE_REGULATION_OF_PROTEIN_KINASE_ACTIVITY        | 424 | 0.28823414 | 1.4220378 | 0           | 0.26875305  | 1     |
| GOBP_DEVELOPMENTAL_GROWTH                                  | 449 | 0.2818112  | 1.4158745 | 0           | 0.27514857  | 1     |
| GOBP_RESPONSE_TO_PEPTIDE_HORMONE                           | 339 | 0.28934994 | 1.4107841 | 0           | 0.2774158   | 1     |
| GOBP_REGULATION_OF_VESICLE_MEDIATED_TRANSPORT              | 402 | 0.2857517  | 1.3932171 | 0           | 0.29083502  | 1     |
| GOBP_REACTIVE_NITROGEN_SPECIES_METABOLIC_PROCESS           | 62  | 0.45692566 | 1.7338932 | 0.002325581 | 0.10487625  | 0.999 |
| GOBP_CELL_JUNCTION_DISASSEMBLY                             | 19  | 0.6348267  | 1.8107029 | 0.002375297 | 0.07426099  | 0.971 |
| GOBP_COMPLEMENT_ACTIVATION                                 | 32  | 0.55195487 | 1.782293  | 0.002375297 | 0.08426918  | 0.985 |
| GOBP_BONE_RESORPTION                                       | 49  | 0.46180084 | 1.6836913 | 0.002380953 | 0.12555255  | 1     |
| GOBP_OOCYTE_MATURATION                                     | 18  | 0.6339974  | 1.8231547 | 0.002409639 | 0.07055148  | 0.958 |
| GOBP_RESPONSE_TO_NICOTINE                                  | 22  | 0.6264463  | 1.8731664 | 0.002439024 | 0.060179185 | 0.858 |
| GOBP_PROTEIN_CONTAINING_COMPLEX_REMODELING                 | 19  | 0.6946758  | 1.9692795 | 0.002444988 | 0.03746961  | 0.495 |
| GOBP_INORGANIC_ANION_TRANSMEMBRANE_TRANSPORT               | 60  | 0.44867176 | 1.6778549 | 0.002463054 | 0.1276236   | 1     |
| GOBP_APOPTOTIC_CELL_CLEARANCE                              | 39  | 0.5381548  | 1.8564727 | 0.002469136 | 0.06335574  | 0.901 |
| GOBP_POSITIVE_REGULATION_OF_STEROL_TRANSPORT               | 24  | 0.60908484 | 1.889437  | 0.002475248 | 0.058414526 | 0.805 |
| GOBP_REGULATION_OF_MACROPHAGE_MIGRATION                    | 34  | 0.5325363  | 1.7761378 | 0.002487562 | 0.08697085  | 0.989 |
| GOBP_LUNG_ALVEOLUS_DEVELOPMENT                             | 32  | 0.5358155  | 1.7694569 | 0.0025      | 0.08898389  | 0.994 |
| GOBP_RESPONSE_TO_CHEMOKINE                                 | 68  | 0.4548171  | 1.7351528 | 0.002506266 | 0.10479331  | 0.999 |
| GOBP_NEGATIVE_REGULATION_OF_ENDOTHELIAL_CELL_PROLIFERATION | 38  | 0.4804347  | 1.6542069 | 0.002518892 | 0.13914351  | 1     |
| GOBP_ANTIMICROBIAL_HUMORAL_RESPONSE                        | 46  | 0.52343667 | 1.8741313 | 0.002531646 | 0.060841516 | 0.857 |
| GOBP_REGULATION_OF_HUMORAL_IMMUNE_RESPONSE                 | 42  | 0.5120623  | 1.7886517 | 0.002544529 | 0.085063465 | 0.982 |
| GOBP_POSITIVE_REGULATION_OF_REPRODUCTIVE_PROCESS           | 48  | 0.48244122 | 1.7509493 | 0.002544529 | 0.09894315  | 0.997 |
| GOBP_REGULATION_OF_OSTEOCLAST_DIFFERENTIATION              | 48  | 0.4948901  | 1.792511  | 0.002557545 | 0.082900904 | 0.978 |
| GOBP_REGULATION_OF_APOPTOSIS                               | 20  | 0.6204975  | 1.8480917 | 0.002564103 | 0.0656997   | 0.916 |
| GOBP_POSITIVE_REGULATION_OF_MITOTIC_NUCLEAR_DIVISION       | 35  | 0.54215854 | 1.7739526 | 0.002570694 | 0.08690034  | 0.991 |
| GOBP_STEROL_TRANSPORT                                      | 85  | 0.4155536  | 1.6613889 | 0.00257732  | 0.13526404  | 1     |
| GOBP_MACROPHAGE_MIGRATION                                  | 42  | 0.52169204 | 1.8349603 | 0.002583979 | 0.065857425 | 0.935 |
| GOBP_FATTY_ACID_TRANSMEMBRANE_TRANSPORT                    | 40  | 0.49322477 | 1.7287283 | 0.002583979 | 0.107529484 | 0.999 |
| GOBP_AMINO_ACID_TRANSMEMBRANE_TRANSPORT                    | 65  | 0.44055128 | 1.6806811 | 0.002604167 | 0.12762453  | 1     |
| GOBP_ORGANIC_ACID_TRANSMEMBRANE_TRANSPORT                  | 114 | 0.3754804  | 1.570754  | 0.002617801 | 0.18499589  | 1     |
| GOBP_PHOSPHATIDYLCHOLINE_METABOLIC_PROCESS                 | 61  | 0.4429634  | 1.6673448 | 0.002624672 | 0.13162449  | 1     |
| GOBP_GLIAL_CELL_PROLIFERATION                              | 38  | 0.5418063  | 1.8428729 | 0.002631579 | 0.0650879   | 0.927 |
| GOBP_REGULATION_OF_BONE_REMODELING                         | 39  | 0.57027495 | 1.9447044 | 0.002659574 | 0.04393421  | 0.586 |
| GOBP_BONE_REMODELING                                       | 65  | 0.42244816 | 1.6180537 | 0.002666667 | 0.15770516  | 1     |
| GOBP_DETOXIFICATION                                        | 87  | 0.40916768 | 1.6096151 | 0.002666667 | 0.16362932  | 1     |
| GOBP_NEGATIVE_REGULATION_OF_RESPONSE_TO_WOUNDING           | 64  | 0.42476365 | 1.6153094 | 0.002673797 | 0.16004235  | 1     |
| GOBP_REGULATION_OF_NIK_NF_KAPPAB_SIGNALING                 | 86  | 0.42095777 | 1.6972322 | 0.002702703 | 0.11940844  | 1     |
| GOBP_POSITIVE_REGULATION_OF_CHEMOTAXIS                     | 110 | 0.38477153 | 1.6332135 | 0.002785515 | 0.1496374   | 1     |

|                                                                 |     |            |           |             |             |       |
|-----------------------------------------------------------------|-----|------------|-----------|-------------|-------------|-------|
| GOBP_ORGAN_GROWTH                                               | 117 | 0.37949845 | 1.630572  | 0.002785515 | 0.15011348  | 1     |
| GOBP_REGULATION_OF_CYCLIN_DEPENDENT_PROTEIN_KINASE_ACTIVITY     | 89  | 0.36891395 | 1.5080333 | 0.002793296 | 0.222183    | 1     |
| GOBP_REGULATION_OF_CHEMOTAXIS                                   | 176 | 0.33362937 | 1.5172645 | 0.002801121 | 0.21797705  | 1     |
| GOBP_TOLL_LIKE_RECEPTOR_SIGNALING_PATHWAY                       | 138 | 0.33904704 | 1.4743819 | 0.002816901 | 0.24239105  | 1     |
| GOBP_REGULATION_OF_REACTIVE_OXYGEN_SPECIES_BIOSYNTHETIC_PROCESS | 71  | 0.44096142 | 1.7396696 | 0.002906977 | 0.10333735  | 0.999 |
| GOBP_POSITIVE_REGULATION_OF_HEMOPOIESIS                         | 126 | 0.37844673 | 1.6362063 | 0.002915452 | 0.14874852  | 1     |
| GOBP_REGULATION_OF_MAP_KINASE_ACTIVITY                          | 250 | 0.29788762 | 1.4025621 | 0.002932551 | 0.28342456  | 1     |
| GOBP_REGULATION_OF_RESPONSE_TO_WOUNDING                         | 121 | 0.35245305 | 1.506752  | 0.002976191 | 0.22032402  | 1     |
| GOBP_POSITIVE_REGULATION_OF_IMMUNE_EFFECTOR_PROCESS             | 167 | 0.32894906 | 1.4800218 | 0.003012048 | 0.2392929   | 1     |
| GOBP_NEGATIVE_REGULATION_OF_RESPONSE_TO_EXTERNAL_STIMULUS       | 272 | 0.3007351  | 1.4399426 | 0.003076923 | 0.2607385   | 1     |
| GOBP_LEUKOCYTE_CHEMOTAXIS                                       | 171 | 0.38666117 | 1.7478673 | 0.00308642  | 0.09905817  | 0.997 |
| GOBP_POSITIVE_REGULATION_OF_PROTEIN_SERINE_THREONINE_KINASE_ACT | 254 | 0.31636843 | 1.4920149 | 0.003095975 | 0.23356691  | 1     |
| GOBP_PHAGOCYTOSIS                                               | 228 | 0.3344991  | 1.5577139 | 0.003134796 | 0.19196446  | 1     |
| GOBP_MAINTENANCE_OF_LOCATION                                    | 259 | 0.30788368 | 1.463371  | 0.003154574 | 0.24757554  | 1     |
| GOBP_REGULATION_OF_VASCULATURE_DEVELOPMENT                      | 232 | 0.30722612 | 1.4375677 | 0.003194888 | 0.26175883  | 1     |
| GOBP_POSITIVE_REGULATION_OF_CELL_ADHESION                       | 340 | 0.2809048  | 1.374318  | 0.003333333 | 0.3039516   | 1     |
| GOBP_POSITIVE_REGULATION_OF_IMMUNE_RESPONSE                     | 495 | 0.25376353 | 1.2856323 | 0.004016064 | 0.3872321   | 1     |
| GOBP_RESPONSE_TO_ISCHEMIA                                       | 42  | 0.5057198  | 1.7770532 | 0.004750594 | 0.08717787  | 0.989 |
| GOBP_OOCYTE_DIFFERENTIATION                                     | 31  | 0.5647895  | 1.8499744 | 0.004784689 | 0.06554252  | 0.914 |
| GOBP_REGULATION_OF_MYELOID_LEUKOCYTE_MEDIATED_IMMUNITY          | 44  | 0.48460588 | 1.7075646 | 0.004784689 | 0.11488579  | 1     |
| GOBP_RESPONSE_TO_FUNGUS                                         | 25  | 0.5531681  | 1.7021644 | 0.004796163 | 0.116648555 | 1     |
| GOBP_LIPID_IMPORT_INTO_CELL                                     | 28  | 0.59610844 | 1.8725711 | 0.004819277 | 0.059300445 | 0.859 |
| GOBP_REGULATION_OF_GRANULOCYTE_CHEMOTAXIS                       | 38  | 0.5038997  | 1.7136985 | 0.004878049 | 0.11416299  | 0.999 |
| GOBP_POSITIVE_REGULATION_OF_MACROPHAGE_ACTIVATION               | 22  | 0.62394005 | 1.8950655 | 0.004914005 | 0.056302123 | 0.79  |
| GOBP_POSITIVE_REGULATION_OF_STEROID_METABOLIC_PROCESS           | 19  | 0.62552917 | 1.8252655 | 0.004926108 | 0.070054434 | 0.954 |
| GOBP_POSITIVE_REGULATION_OF_CYCLIN_DEPENDENT_PROTEIN_KINASE_ACT | 30  | 0.55070007 | 1.7873818 | 0.004987531 | 0.08302771  | 0.982 |
| GOBP_PHOSPHATIDYLCHOLINE_BIOSYNTHETIC_PROCESS                   | 30  | 0.58932036 | 1.9103565 | 0.005012531 | 0.05069745  | 0.721 |
| GOBP_REGULATION_OF_GLUCOSE_TRANSMEMBRANE_TRANSPORT              | 58  | 0.4437931  | 1.6696054 | 0.005012531 | 0.13160521  | 1     |
| GOBP_REGULATION_OF_MACROPHAGE_CHEMOTAXIS                        | 23  | 0.5857195  | 1.7790568 | 0.005025126 | 0.0863091   | 0.988 |
| GOBP_POSITIVE_REGULATION_OF_VASCULAR_ENDOTHELIAL_GROWTH_FACTO   | 23  | 0.61664325 | 1.9220353 | 0.005037783 | 0.0500844   | 0.667 |
| GOBP_NEGATIVE_REGULATION_OF_LIPID_BIOSYNTHETIC_PROCESS          | 40  | 0.4673323  | 1.643363  | 0.005089059 | 0.1423167   | 1     |
| GOBP_NEUROINFLAMMATORY_RESPONSE                                 | 35  | 0.54496795 | 1.8769737 | 0.005194805 | 0.06017676  | 0.847 |
| GOBP_POSITIVE_REGULATION_OF_LEUKOCYTE_DEGRANULATION             | 17  | 0.6208739  | 1.7884123 | 0.005208334 | 0.084234275 | 0.982 |
| GOBP_INTERLEUKIN_8_PRODUCTION                                   | 73  | 0.40332642 | 1.5681372 | 0.005263158 | 0.18551262  | 1     |
| GOBP_REGULATION_OF_NITRIC_OXIDE_METABOLIC_PROCESS               | 50  | 0.47175512 | 1.7117095 | 0.005291005 | 0.11285754  | 1     |
| GOBP_REGULATION_OF_BIOMINERALIZATION                            | 65  | 0.42781183 | 1.6455745 | 0.005405406 | 0.14327872  | 1     |
| GOBP_ACTIVATION_OF_MAPK_ACTIVITY                                | 120 | 0.36628142 | 1.5513681 | 0.005405406 | 0.19591089  | 1     |
| GOBP_REGULATION_OF_CALCIIUM_MEDIATED_SIGNALING                  | 50  | 0.44548455 | 1.6315782 | 0.005509642 | 0.15065774  | 1     |

|                                                                  |     |            |           |             |             |       |
|------------------------------------------------------------------|-----|------------|-----------|-------------|-------------|-------|
| GOBP_NEGATIVE_REGULATION_OF_NEURON_DEATH                         | 137 | 0.33829746 | 1.479381  | 0.005509642 | 0.23954831  | 1     |
| GOBP_MEMBRANE_PROTEIN_PROTEOLYSIS                                | 55  | 0.42824218 | 1.6058515 | 0.005524862 | 0.16560224  | 1     |
| GOBP_REGULATION_OF_NERVOUS_SYSTEM_PROCESS                        | 87  | 0.384619   | 1.5860901 | 0.005633803 | 0.17561002  | 1     |
| GOBP_MONONUCLEAR_CELL_MIGRATION                                  | 142 | 0.3758346  | 1.6640614 | 0.005649718 | 0.13338487  | 1     |
| GOBP_POSITIVE_REGULATION_OF_TUMOR_NECROSIS_FACTOR_SUPERFAMILY    | 75  | 0.4204329  | 1.6436318 | 0.005730659 | 0.14277735  | 1     |
| GOBP_ENDOTHELIAL_CELL_PROLIFERATION                              | 129 | 0.36060023 | 1.5888034 | 0.005730659 | 0.17343654  | 1     |
| GOBP_POSITIVE_REGULATION_OF_PEPTIDYL_TYROSINE_PHOSPHORYLATION    | 139 | 0.35194474 | 1.5060722 | 0.005763689 | 0.22065318  | 1     |
| GOBP_POSITIVE_REGULATION_OF_LEUKOCYTE_CELL_CELL_ADHESION         | 187 | 0.33285037 | 1.5092751 | 0.005813954 | 0.22271083  | 1     |
| GOBP_REGULATION_OF_HEMOPOIESIS                                   | 329 | 0.28807858 | 1.3888378 | 0.006430868 | 0.2929336   | 1     |
| GOBP_REGULATION_OF_INFLAMMATORY_RESPONSE                         | 258 | 0.32112998 | 1.5319859 | 0.006622517 | 0.21078531  | 1     |
| GOBP_CELLULAR_RESPONSE_TO_PEPTIDE                                | 310 | 0.28641146 | 1.3856363 | 0.006644518 | 0.29356098  | 1     |
| GOBP_REGULATION_OF_IMMUNE_EFFECTOR_PROCESS                       | 307 | 0.28524187 | 1.3789424 | 0.006825938 | 0.30127743  | 1     |
| GOBP_T_CELL_ACTIVATION                                           | 384 | 0.26868042 | 1.3258061 | 0.006993007 | 0.35320905  | 1     |
| GOBP_FEAR_RESPONSE                                               | 19  | 0.65534216 | 1.940624  | 0.007159905 | 0.044854827 | 0.603 |
| GOBP_NEGATIVE_REGULATION_OF_TISSUE_REMODELING                    | 15  | 0.66850275 | 1.8721851 | 0.007194245 | 0.05856929  | 0.861 |
| GOBP_NEGATIVE_REGULATION_OF_OXIDATIVE_STRESS_INDUCED_NEURON_D    | 15  | 0.6495158  | 1.7738836 | 0.007317073 | 0.08609564  | 0.991 |
| GOBP_RESPONSE_TO_MINERALOCORTICOID                               | 21  | 0.5732826  | 1.7038823 | 0.007334963 | 0.11766539  | 1     |
| GOBP_REGULATION_OF_STEROL_TRANSPORT                              | 41  | 0.48499978 | 1.7210643 | 0.007352941 | 0.109632105 | 0.999 |
| GOBP_RETINA_HOMEOSTASIS                                          | 43  | 0.4845456  | 1.708213  | 0.007389163 | 0.11507728  | 1     |
| GOBP_POSITIVE_REGULATION_OF_MEMBRANE_PROTEIN_ECTODOMAIN_PROT     | 15  | 0.6596427  | 1.7745688 | 0.007537689 | 0.08733851  | 0.991 |
| GOBP_TOLL_LIKE_RECEPTOR_4_SIGNALING_PATHWAY                      | 37  | 0.51952404 | 1.7578459 | 0.007594937 | 0.09487962  | 0.994 |
| GOBP_POSITIVE_REGULATION_OF_VASCULAR_ASSOCIATED_SMOOTH_MUSCLE    | 29  | 0.52071196 | 1.6949664 | 0.007614213 | 0.11886496  | 1     |
| GOBP_ENDOTHELIAL_CELL_APOPTOTIC_PROCESS                          | 44  | 0.4545909  | 1.6197232 | 0.007692308 | 0.15659769  | 1     |
| GOBP_NEGATIVE_REGULATION_OF_LEUKOCYTE_PROLIFERATION              | 66  | 0.4028188  | 1.5575606 | 0.007792208 | 0.19139147  | 1     |
| GOBP_POSITIVE_REGULATION_OF_STRESS_ACTIVATED_PROTEIN_KINASE_SIGN | 98  | 0.36226553 | 1.4963299 | 0.007915568 | 0.23119308  | 1     |
| GOBP_POSITIVE_REGULATION_OF_REACTIVE_OXYGEN_SPECIES_BIOSYNTHETIC | 38  | 0.49381715 | 1.6989425 | 0.007978723 | 0.1187944   | 1     |
| GOBP_EPITHELIAL_CELL_APOPTOTIC_PROCESS                           | 84  | 0.39295658 | 1.5765738 | 0.008       | 0.18132727  | 1     |
| GOBP_PEPTIDYL_CYSTEINE_MODIFICATION                              | 42  | 0.49829915 | 1.7389756 | 0.00802139  | 0.1029558   | 0.999 |
| GOBP_TEMPERATURE_HOMEOSTASIS                                     | 133 | 0.3511494  | 1.4936432 | 0.008042895 | 0.23272519  | 1     |
| GOBP_REGULATION_OF_MONOOXYGENASE_ACTIVITY                        | 48  | 0.44264373 | 1.5915192 | 0.008086253 | 0.17185201  | 1     |
| GOBP_ZYMOGEN_ACTIVATION                                          | 40  | 0.48272014 | 1.6846813 | 0.008196721 | 0.12643766  | 1     |
| GOBP_L_ALPHA_AMINO_ACID_TRANSMEMBRANE_TRANSPORT                  | 44  | 0.46812576 | 1.6554121 | 0.008196721 | 0.13871716  | 1     |
| GOBP_METAL_ION_HOMEOSTASIS                                       | 453 | 0.2510517  | 1.2615561 | 0.008264462 | 0.40902218  | 1     |
| GOBP_NEGATIVE_REGULATION_OF_LIPID_METABOLIC_PROCESS              | 69  | 0.41519794 | 1.6061229 | 0.008379889 | 0.1660523   | 1     |
| GOBP_SUBSTRATE_ADHESION_DEPENDENT_CELL_SPREADING                 | 93  | 0.3697598  | 1.508293  | 0.008426966 | 0.2233602   | 1     |
| GOBP_POSITIVE_REGULATION_OF_EPITHELIAL_CELL_PROLIFERATION        | 146 | 0.32659703 | 1.4333768 | 0.008426966 | 0.26318842  | 1     |
| GOBP_REGULATION_OF_CELL_SUBSTRATE_ADHESION                       | 176 | 0.3213199  | 1.4460073 | 0.008498584 | 0.25632325  | 1     |
| GOBP_POSITIVE_REGULATION_OF_VASCULATURE_DEVELOPMENT              | 130 | 0.3460236  | 1.4918073 | 0.008571428 | 0.23316252  | 1     |

|                                                                                |     |            |           |             |             |       |
|--------------------------------------------------------------------------------|-----|------------|-----------|-------------|-------------|-------|
| GOBP_REGULATION_OF_LEUKOCYTE_DIFFERENTIATION                                   | 228 | 0.30009732 | 1.3813529 | 0.008849558 | 0.2990635   | 1     |
| GOBP_POSITIVE_REGULATION_OF_SMOOTH_MUSCLE_CONTRACTION                          | 15  | 0.64384425 | 1.7617446 | 0.009280742 | 0.09240152  | 0.994 |
| GOBP_REGULATION_OF_MAST_CELL_ACTIVATION                                        | 32  | 0.49113375 | 1.6678534 | 0.009638554 | 0.13191065  | 1     |
| GOBP_REGULATION_OF_MACROPHAGE_DERIVED_FOAM_CELL_DIFFERENTIATION                | 19  | 0.6061507  | 1.7525008 | 0.009779952 | 0.09826745  | 0.995 |
| GOBP_REGULATION_OF_NEUTROPHIL_CHEMOTAXIS                                       | 26  | 0.54183674 | 1.6961623 | 0.01        | 0.11948304  | 1     |
| GOBP_REGULATION_OF_TRANSMEMBRANE_TRANSPORT                                     | 374 | 0.2723477  | 1.3333815 | 0.01010101  | 0.34871244  | 1     |
| GOBP_POSITIVE_REGULATION_OF_NUCLEAR_DIVISION                                   | 45  | 0.5131179  | 1.8165097 | 0.010204081 | 0.07391592  | 0.966 |
| GOBP_POSITIVE_REGULATION_OF_LIPID_TRANSPORT                                    | 63  | 0.4117065  | 1.6043499 | 0.010230179 | 0.16495794  | 1     |
| GOBP_REGULATION_OF_PLATELET_ACTIVATION                                         | 30  | 0.53001213 | 1.7323066 | 0.010282776 | 0.1053674   | 0.999 |
| GOBP_REGULATION_OF_EXTRINSIC_APOPTOTIC_SIGNALING_PATHWAY_IN_AB                 | 32  | 0.51227874 | 1.6950687 | 0.010282776 | 0.119646296 | 1     |
| GOBP_HORMONE_METABOLIC_PROCESS                                                 | 114 | 0.33379483 | 1.4257572 | 0.010526316 | 0.26712477  | 1     |
| GOBP_OSSIFICATION                                                              | 301 | 0.27649924 | 1.3315026 | 0.01056338  | 0.35056     | 1     |
| GOBP_REGULATION_OF_REGULATED_SECRETORY_PATHWAY                                 | 95  | 0.36071736 | 1.5074137 | 0.01058201  | 0.22236076  | 1     |
| GOBP_NEGATIVE_REGULATION_OF_NF_KAPPAB_TRANSCRIPTION_FACTOR_ACTIVATION          | 71  | 0.3919931  | 1.5125463 | 0.010638298 | 0.22104146  | 1     |
| GOBP_NEGATIVE_REGULATION_OF_CELL_CELL_ADHESION                                 | 143 | 0.3243226  | 1.427016  | 0.010638298 | 0.26832736  | 1     |
| GOBP_ADENYLATE_CYCLASE_MODULATING_G_PROTEIN_COUPLED_RECEPTOR_SIGNALING_PATHWAY | 127 | 0.32784224 | 1.4321107 | 0.010695187 | 0.2645301   | 1     |
| GOBP_ACUTE_INFLAMMATORY_RESPONSE                                               | 67  | 0.41475508 | 1.5804967 | 0.010781671 | 0.18026693  | 1     |
| GOBP_CELLULAR_RESPONSE_TO_TOXIC_SUBSTANCE                                      | 82  | 0.3639873  | 1.4805785 | 0.010810811 | 0.23920624  | 1     |
| GOBP_CIRCULATORY_SYSTEM_PROCESS                                                | 413 | 0.255753   | 1.2800558 | 0.010869565 | 0.39246637  | 1     |
| GOBP_OSTEOCLAST_DIFFERENTIATION                                                | 75  | 0.3916842  | 1.5414318 | 0.010928961 | 0.20371854  | 1     |
| GOBP_POSITIVE_REGULATION_OF_ANION_TRANSPORT                                    | 373 | 0.26243785 | 1.2971817 | 0.010989011 | 0.37609506  | 1     |
| GOBP_REGULATION_OF_MITOTIC_NUCLEAR_DIVISION                                    | 99  | 0.35021937 | 1.4376717 | 0.011019284 | 0.2622497   | 1     |
| GOBP_SMOOTH_MUSCLE_CELL_PROLIFERATION                                          | 113 | 0.35795978 | 1.5070993 | 0.011080332 | 0.22127827  | 1     |
| GOBP_POSITIVE_REGULATION_OF_SMALL_MOLECULE_METABOLIC_PROCESS                   | 99  | 0.36528787 | 1.5113013 | 0.011695907 | 0.22118042  | 1     |
| GOBP_PROTEIN_PROCESSING                                                        | 164 | 0.32205927 | 1.4457905 | 0.011695907 | 0.25529778  | 1     |
| GOBP_REGULATION_OF_PEPTIDYL_TYROSINE_PHOSPHORYLATION                           | 199 | 0.31400394 | 1.4305085 | 0.011764706 | 0.2658502   | 1     |
| GOBP_LEUKOCYTE_MIGRATION_INVOLVED_IN_INFLAMMATORY_RESPONSE                     | 15  | 0.63447857 | 1.7146002 | 0.011792453 | 0.114142135 | 0.999 |
| GOBP_IMPORT_INTO_CELL                                                          | 151 | 0.3148921  | 1.3982687 | 0.011869436 | 0.2875318   | 1     |
| GOBP_REGULATION_OF_OXIDATIVE_STRESS_INDUCED_NEURON_DEATH                       | 21  | 0.5611327  | 1.7117716 | 0.011990408 | 0.11370769  | 1     |
| GOBP_ORGANIC_ACID_TRANSPORT                                                    | 203 | 0.2911533  | 1.3322849 | 0.012012012 | 0.3502386   | 1     |
| GOBP_NEGATIVE_REGULATION_OF_LIPID_CATABOLIC_PROCESS                            | 16  | 0.64387316 | 1.7864416 | 0.012048192 | 0.08283513  | 0.985 |
| GOBP_MEMBRANE_PROTEIN_ECTODOMAIN_PROTEOLYSIS                                   | 39  | 0.47926745 | 1.6461227 | 0.012195122 | 0.14435925  | 1     |
| GOBP_POTASSIUM_ION_TRANSPORT                                                   | 133 | 0.34859496 | 1.5272964 | 0.012307692 | 0.21431185  | 1     |
| GOBP_MYOTUBE_CELL_DEVELOPMENT                                                  | 22  | 0.5526524  | 1.6292902 | 0.012376238 | 0.1500577   | 1     |
| GOBP_NEGATIVE_REGULATION_OF_MUSCLE_CELL_APOPTOTIC_PROCESS                      | 27  | 0.4992926  | 1.5953761 | 0.0125      | 0.1704636   | 1     |
| GOBP_POSITIVE_REGULATION_OF_BONE_MINERALIZATION                                | 28  | 0.5283764  | 1.6531644 | 0.012531328 | 0.13952285  | 1     |
| GOBP_MONOCYTE_CHEMOTAXIS                                                       | 39  | 0.4834688  | 1.6506824 | 0.012594459 | 0.14165054  | 1     |
| GOBP_REGULATION_OF_CHOLESTEROL_EFFLUX                                          | 24  | 0.5661572  | 1.7380271 | 0.012919896 | 0.10296441  | 0.999 |

|                                                                   |     |            |           |             |             |       |
|-------------------------------------------------------------------|-----|------------|-----------|-------------|-------------|-------|
| GOBP_CELLULAR_RESPONSE_TO_PEPTIDE_HORMONE_STIMULUS                | 253 | 0.30113634 | 1.4084607 | 0.012987013 | 0.27805862  | 1     |
| GOBP_POSITIVE_REGULATION_OF_ENDOTHELIAL_CELL_APOPTOTIC_PROCESS    | 15  | 0.63918376 | 1.7402861 | 0.01305483  | 0.10466282  | 0.999 |
| GOBP_REGULATION_OF_EPITHELIAL_TO_MESENCHYMAL_TRANSITION           | 84  | 0.36142054 | 1.4457461 | 0.013089005 | 0.2546847   | 1     |
| GOBP_REGULATION_OF_SENSORY_PERCEPTION                             | 20  | 0.59628665 | 1.7230166 | 0.013192612 | 0.10863714  | 0.999 |
| GOBP_FEEDING_BEHAVIOR                                             | 39  | 0.46559623 | 1.6029547 | 0.013477089 | 0.16490579  | 1     |
| GOBP_IMPORT_ACROSS_PLASMA_MEMBRANE                                | 107 | 0.33979845 | 1.4249538 | 0.013477089 | 0.2671879   | 1     |
| GOBP_POSITIVE_REGULATION_OF_SMOOTH_MUSCLE_CELL_PROLIFERATION      | 72  | 0.40308726 | 1.6023651 | 0.013586956 | 0.16484381  | 1     |
| GOBP_REGULATION_OF_EPITHELIAL_CELL_APOPTOTIC_PROCESS              | 63  | 0.39183977 | 1.4906535 | 0.013623978 | 0.23202151  | 1     |
| GOBP_NEGATIVE_REGULATION_OF_OSSIFICATION                          | 25  | 0.50486344 | 1.6048901 | 0.013921114 | 0.16578043  | 1     |
| GOBP_INTERLEUKIN_12_PRODUCTION                                    | 51  | 0.42676893 | 1.5672424 | 0.013927577 | 0.18523493  | 1     |
| GOBP_REGULATION_OF_HORMONE_LEVELS                                 | 312 | 0.27270377 | 1.3251156 | 0.013986014 | 0.3520695   | 1     |
| GOBP_POSITIVE_REGULATION_OF_PEPTIDE_SECRETION                     | 107 | 0.34855455 | 1.4547989 | 0.014084507 | 0.2505229   | 1     |
| GOBP_PROTEIN_NITROSYLATION                                        | 15  | 0.62324095 | 1.6587385 | 0.014184397 | 0.1357773   | 1     |
| GOBP_SENSORY_PERCEPTION_OF_SMELL                                  | 17  | 0.5936982  | 1.6724135 | 0.014634146 | 0.1307972   | 1     |
| GOBP_PATTERN_RECOGNITION_RECEPTOR_SIGNALING_PATHWAY               | 185 | 0.30856076 | 1.4264746 | 0.014705882 | 0.26790664  | 1     |
| GOBP_NEGATIVE_REGULATION_OF_INTERLEUKIN_6_PRODUCTION              | 40  | 0.4745933  | 1.6471272 | 0.014778325 | 0.14388126  | 1     |
| GOBP_FOAM_CELL_DIFFERENTIATION                                    | 25  | 0.52969694 | 1.6446856 | 0.014888338 | 0.14262472  | 1     |
| GOBP_POSITIVE_REGULATION_OF_OSTEOCLAST_DIFFERENTIATION            | 20  | 0.57774085 | 1.7287197 | 0.014962593 | 0.10663143  | 0.999 |
| GOBP_NEGATIVE_REGULATION_OF_OSTEOCLAST_DIFFERENTIATION            | 21  | 0.5812969  | 1.7262357 | 0.015       | 0.106514774 | 0.999 |
| GOBP_REGULATION_OF_LEUKOCYTE_MEDIATED_IMMUNITY                    | 164 | 0.3225913  | 1.458855  | 0.015060241 | 0.25040928  | 1     |
| GOBP_REGULATION_OF_SECRETION                                      | 428 | 0.24926366 | 1.2492322 | 0.01532567  | 0.42411035  | 1     |
| GOBP_NEGATIVE_REGULATION_OF_EXTRINSIC_APOPTOTIC_SIGNALING_PATHWAY | 85  | 0.38640592 | 1.5422671 | 0.015337423 | 0.20410934  | 1     |
| GOBP_POSITIVE_REGULATION_OF_GRANULOCYTE_CHEMOTAXIS                | 19  | 0.56297785 | 1.6458613 | 0.015424165 | 0.14382079  | 1     |
| GOBP_STEROL_HOMEOSTASIS                                           | 58  | 0.40463874 | 1.525694  | 0.015424165 | 0.21502411  | 1     |
| GOBP_REGULATION_OF_GLIAL_CELL_MIGRATION                           | 16  | 0.63799274 | 1.7624476 | 0.015544041 | 0.09282451  | 0.994 |
| GOBP_ENDOCRINE_PROCESS                                            | 47  | 0.43692347 | 1.5732384 | 0.015544041 | 0.18331341  | 1     |
| GOBP_MACROPHAGE_ACTIVATION                                        | 81  | 0.35326102 | 1.4279175 | 0.015544041 | 0.26747897  | 1     |
| GOBP_L_AMINO_ACID_TRANSPORT                                       | 48  | 0.44928923 | 1.612784  | 0.015706806 | 0.16136892  | 1     |
| GOBP_OVULATION_CYCLE                                              | 44  | 0.44781184 | 1.6017925 | 0.015706806 | 0.16395378  | 1     |
| GOBP_HETEROTYPIC_CELL_CELL_ADHESION                               | 43  | 0.43924034 | 1.5279161 | 0.015748031 | 0.2141171   | 1     |
| GOBP_REGULATION_OF_PROTEIN_TYROSINE_KINASE_ACTIVITY               | 80  | 0.36573333 | 1.4672756 | 0.015873017 | 0.24573144  | 1     |
| GOBP_REACTIVE_OXYGEN_SPECIES_BIOSYNTHETIC_PROCESS                 | 86  | 0.37753555 | 1.5197067 | 0.01591512  | 0.21609247  | 1     |
| GOBP_REGULATION_OF_SYSTEMIC_ARTERIAL_BLOOD_PRESSURE_MEDIATED_BY   | 28  | 0.522835   | 1.6604383 | 0.016203703 | 0.13472903  | 1     |
| GOBP_REGULATION_OF_LIPID_BIOSYNTHETIC_PROCESS                     | 154 | 0.31902218 | 1.4151542 | 0.016713092 | 0.27445737  | 1     |
| GOBP_EXTERNAL_ENCAPSULATING_STRUCTURE_ORGANIZATION                | 309 | 0.2638814  | 1.2799995 | 0.016891891 | 0.39200503  | 1     |
| GOBP_LIPID_TRANSLOCATION                                          | 36  | 0.45440337 | 1.569418  | 0.01703163  | 0.1859569   | 1     |
| GOBP_POSITIVE_REGULATION_OF_MONONUCLEAR_CELL_MIGRATION            | 50  | 0.4037019  | 1.4854333 | 0.017114915 | 0.23431353  | 1     |
| GOBP_LAMELLIPODIUM_MORPHOGENESIS                                  | 15  | 0.61598325 | 1.6765971 | 0.017412934 | 0.12811816  | 1     |

|                                                                         |     |            |           |             |            |   |
|-------------------------------------------------------------------------|-----|------------|-----------|-------------|------------|---|
| GOBP_NEGATIVE_REGULATION_OF_PRODUCTION_OF_MOLECULAR_MEDIATOR            | 26  | 0.4974517  | 1.5781171 | 0.01758794  | 0.18102346 | 1 |
| GOBP_NIK_NF_KAPPAB_SIGNALING                                            | 156 | 0.30587348 | 1.3683738 | 0.017804155 | 0.3093236  | 1 |
| GOBP_REGULATION_OF_DEVELOPMENTAL_GROWTH                                 | 229 | 0.27601817 | 1.2788026 | 0.017804155 | 0.38930404 | 1 |
| GOBP_NEGATIVE_REGULATION_OF_CELL_ADHESION                               | 225 | 0.28296712 | 1.3176531 | 0.017964073 | 0.3593764  | 1 |
| GOBP_REGULATION_OF_SYSTEM_PROCESS                                       | 371 | 0.2502261  | 1.234354  | 0.018181818 | 0.43407494 | 1 |
| GOBP_ORGANIC_HYDROXY_COMPOUND_TRANSPORT                                 | 165 | 0.31098032 | 1.3941288 | 0.018461538 | 0.29118237 | 1 |
| GOBP_NEGATIVE_REGULATION_OF_WOUND_HEALING                               | 50  | 0.41632858 | 1.5206227 | 0.018469658 | 0.21632817 | 1 |
| GOBP_LUNG_CELL_DIFFERENTIATION                                          | 16  | 0.6134567  | 1.7021854 | 0.018518519 | 0.1174776  | 1 |
| GOBP_NEGATIVE_REGULATION_OF_SIGNAL_TRANSDUCTION_IN_ABSENCE_OF_LIGAND    | 25  | 0.5256189  | 1.612253  | 0.01861702  | 0.16119768 | 1 |
| GOBP_POSITIVE_REGULATION_OF_TRANSMEMBRANE_RECEPTOR_PROTEIN_SIGNALING    | 81  | 0.37151593 | 1.4674091 | 0.01897019  | 0.24616621 | 1 |
| GOBP_TISSUE_HOMEOSTASIS                                                 | 188 | 0.30783463 | 1.4074796 | 0.01910828  | 0.27926946 | 1 |
| GOBP_GERM_CELL_DEVELOPMENT                                              | 146 | 0.34404382 | 1.502428  | 0.019607844 | 0.22370139 | 1 |
| GOBP_CELLULAR_OXIDANT_DETOXIFICATION                                    | 68  | 0.38672197 | 1.4890621 | 0.019830028 | 0.23172271 | 1 |
| GOBP_STRIATED_MUSCLE_CELL_DIFFERENTIATION                               | 186 | 0.30005214 | 1.3888019 | 0.02        | 0.29239142 | 1 |
| GOBP_NEGATIVE_REGULATION_OF_CELL_DEVELOPMENT                            | 120 | 0.31283626 | 1.3449366 | 0.020408163 | 0.333027   | 1 |
| GOBP_LYMPH_NODE_DEVELOPMENT                                             | 15  | 0.59810835 | 1.6608306 | 0.020460358 | 0.13507265 | 1 |
| GOBP_POSITIVE_REGULATION_OF_NITRIC_OXIDE_METABOLIC_PROCESS              | 31  | 0.5193199  | 1.6684885 | 0.020881671 | 0.13215137 | 1 |
| GOBP_POSITIVE_REGULATION_OF_ACTIVATED_T_CELL_PROLIFERATION              | 19  | 0.559794   | 1.6393292 | 0.021028038 | 0.14594564 | 1 |
| GOBP_PROTEIN_KINASE_B_SIGNALING                                         | 198 | 0.28535315 | 1.3278601 | 0.021148037 | 0.35153547 | 1 |
| GOBP_SEXUAL_REPRODUCTION                                                | 489 | 0.24986902 | 1.2541848 | 0.021201413 | 0.4179654  | 1 |
| GOBP_NEGATIVE_REGULATION_OF_CELL_MATRIX_ADHESION                        | 32  | 0.490037   | 1.6332201 | 0.021276595 | 0.15045089 | 1 |
| GOBP_REGULATION_OF_CELL_MATRIX_ADHESION                                 | 104 | 0.34888297 | 1.449956  | 0.021276595 | 0.2543484  | 1 |
| GOBP_EXTRACELLULAR_MATRIX_DISASSEMBLY                                   | 58  | 0.4108185  | 1.5360261 | 0.021563342 | 0.20735615 | 1 |
| GOBP_POSITIVE_REGULATION_OF_MAP_KINASE_ACTIVITY                         | 185 | 0.30602288 | 1.387517  | 0.021671826 | 0.29215777 | 1 |
| GOBP_NEGATIVE_REGULATION_OF_DEVELOPMENTAL_GROWTH                        | 82  | 0.35909775 | 1.4337058 | 0.021686748 | 0.26468414 | 1 |
| GOBP_REGULATION_OF_NITRIC_OXIDE_SYNTHASE_ACTIVITY                       | 42  | 0.47620955 | 1.6453344 | 0.02200489  | 0.14270593 | 1 |
| GOBP_NEGATIVE_REGULATION_OF_B_CELL_ACTIVATION                           | 31  | 0.4896069  | 1.626836  | 0.022038568 | 0.15190846 | 1 |
| GOBP_INTERFERON_GAMMA_PRODUCTION                                        | 84  | 0.35432675 | 1.4525347 | 0.022038568 | 0.25283307 | 1 |
| GOBP_MUSCLE_CELL_PROLIFERATION                                          | 149 | 0.32299787 | 1.4018078 | 0.022099448 | 0.28407305 | 1 |
| GOBP_ANTIMICROBIAL_HUMORAL_IMMUNE_RESPONSE_MEDIATED_BY_ANTIBODIES       | 23  | 0.52847123 | 1.6019242 | 0.022113021 | 0.16461502 | 1 |
| GOBP_ANOIKIS                                                            | 30  | 0.48591632 | 1.5757611 | 0.022167487 | 0.18081807 | 1 |
| GOBP_NEGATIVE_REGULATION_OF_T_CELL_PROLIFERATION                        | 49  | 0.41528118 | 1.503557  | 0.022613065 | 0.22272949 | 1 |
| GOBP_REGULATION_OF_VASCULAR_ASSOCIATED_SMOOTH_MUSCLE_CELL_PROLIFERATION | 47  | 0.43821725 | 1.5614774 | 0.022727273 | 0.18917294 | 1 |
| GOBP_POSITIVE_REGULATION_OF_ENDOTHELIAL_CELL_PROLIFERATION              | 82  | 0.34700873 | 1.3972626 | 0.022900764 | 0.2880696  | 1 |
| GOBP_RESPONSE_TO_CORTICOSTEROID                                         | 104 | 0.3405125  | 1.416081  | 0.022922637 | 0.27539468 | 1 |
| GOBP_MICROGLIAL_CELL_ACTIVATION                                         | 38  | 0.4471882  | 1.517815  | 0.023017902 | 0.21790491 | 1 |
| GOBP_NEGATIVE_REGULATION_OF_MYELOID_LEUKOCYTE_DIFFERENTIATION           | 36  | 0.46478775 | 1.5805283 | 0.023316063 | 0.18102859 | 1 |
| GOBP_REGULATION_OF_SIGNALING_RECEPTOR_ACTIVITY                          | 114 | 0.354324   | 1.4958979 | 0.023391813 | 0.2310415  | 1 |

|                                                           |     |            |           |             |            |   |
|-----------------------------------------------------------|-----|------------|-----------|-------------|------------|---|
| GOBP_EPIBOLY                                              | 32  | 0.47890678 | 1.5799347 | 0.0234375   | 0.18022795 | 1 |
| GOBP_CARBOHYDRATE_TRANSMEMBRANE_TRANSPORT                 | 86  | 0.34387666 | 1.3876479 | 0.0234375   | 0.29253536 | 1 |
| GOBP_SIGNAL_TRANSDUCTION_IN_ABSENCE_OF_LIGAND             | 53  | 0.41302657 | 1.519863  | 0.02356021  | 0.21664503 | 1 |
| GOBP_POSITIVE_REGULATION_OF_MUSCLE_CONTRACTION            | 24  | 0.51354396 | 1.5579271 | 0.023684211 | 0.19242772 | 1 |
| GOBP_ODONTOGENESIS                                        | 78  | 0.36960843 | 1.456906  | 0.023746701 | 0.24927479 | 1 |
| GOBP_REGULATION_OF_BLOOD_PRESSURE                         | 112 | 0.33796492 | 1.4106846 | 0.023746701 | 0.2769611  | 1 |
| GOBP_BONE_GROWTH                                          | 20  | 0.58082545 | 1.6762178 | 0.024330901 | 0.12770931 | 1 |
| GOBP_COBALAMIN_METABOLIC_PROCESS                          | 15  | 0.6030717  | 1.6202677 | 0.024330901 | 0.15685387 | 1 |
| GOBP_SENSORY_PERCEPTION_OF_LIGHT_STIMULUS                 | 113 | 0.3504402  | 1.4710923 | 0.024523161 | 0.2454651  | 1 |
| GOBP_DIVALENT_INORGANIC_CATION_HOMEOSTASIS                | 343 | 0.26139128 | 1.28585   | 0.024734983 | 0.38734868 | 1 |
| GOBP_NEGATIVE_REGULATION_OF_INTERLEUKIN_12_PRODUCTION     | 16  | 0.6023327  | 1.6723171 | 0.024830699 | 0.13005069 | 1 |
| GOBP_PHOSPHOLIPID_TRANSPORT                               | 69  | 0.37210366 | 1.4445355 | 0.025062656 | 0.2558372  | 1 |
| GOBP_BONE_DEVELOPMENT                                     | 147 | 0.31599644 | 1.3839945 | 0.025280898 | 0.29519913 | 1 |
| GOBP_REGULATION_OF_MYELOID_LEUKOCYTE_DIFFERENTIATION      | 91  | 0.34166554 | 1.4087107 | 0.025575448 | 0.27829129 | 1 |
| GOBP_ODONTOGENESIS_OF_DENTIN_CONTAINING_TOOTH             | 50  | 0.41796505 | 1.5223565 | 0.025773196 | 0.21690738 | 1 |
| GOBP_RESPONSE_TO_AMYLOID_BETA                             | 43  | 0.4161464  | 1.4911466 | 0.025773196 | 0.23200649 | 1 |
| GOBP_REGULATION_OF_NUCLEOTIDE_BIOSYNTHETIC_PROCESS        | 28  | 0.4955528  | 1.5915343 | 0.025882352 | 0.17263632 | 1 |
| GOBP_DIENCEPHALON_DEVELOPMENT                             | 34  | 0.46193895 | 1.5269142 | 0.026004728 | 0.21405411 | 1 |
| GOBP_SENSORY_PERCEPTION_OF_PAIN                           | 58  | 0.3883508  | 1.4627697 | 0.026246719 | 0.2470283  | 1 |
| GOBP_GAMETE_GENERATION                                    | 411 | 0.2476645  | 1.2341682 | 0.026515152 | 0.43389007 | 1 |
| GOBP_OSTEOBLAST_DIFFERENTIATION                           | 167 | 0.3008219  | 1.3457035 | 0.026627218 | 0.33284712 | 1 |
| GOBP_REGULATION_OF_RUFFLE_ASSEMBLY                        | 28  | 0.49172872 | 1.5672069 | 0.027173912 | 0.18453    | 1 |
| GOBP_NEGATIVE_REGULATION_OF_NEURON_PROJECTION_DEVELOPMENT | 106 | 0.33104846 | 1.3991164 | 0.027173912 | 0.2880173  | 1 |
| GOBP_CARBOHYDRATE_TRANSPORT                               | 114 | 0.3375519  | 1.4175277 | 0.027472528 | 0.27360103 | 1 |
| GOBP_REGULATION_OF_ADAPTIVE_IMMUNE_RESPONSE               | 137 | 0.31019253 | 1.3559575 | 0.027472528 | 0.323215   | 1 |
| GOBP_DEFENSE_RESPONSE_TO_GRAM_NEGATIVE_BACTERIUM          | 33  | 0.45747003 | 1.5400527 | 0.027522936 | 0.20406191 | 1 |
| GOBP_SENSORY_PERCEPTION_OF_CHEMICAL_STIMULUS              | 41  | 0.45217678 | 1.565743  | 0.027707808 | 0.18577212 | 1 |
| GOBP_REGULATION_OF_MICROGLIAL_CELL_ACTIVATION             | 18  | 0.54582864 | 1.5429721 | 0.027906977 | 0.20387429 | 1 |
| GOBP_REGULATION_OF_COMPLEMENT_ACTIVATION                  | 28  | 0.50702065 | 1.5900122 | 0.027918782 | 0.17271672 | 1 |
| GOBP_REGULATION_OF_MULTICELLULAR_ORGANISM_GROWTH          | 46  | 0.43206576 | 1.5499295 | 0.027918782 | 0.19718845 | 1 |
| GOBP_RHYTHMIC_PROCESS                                     | 222 | 0.2719653  | 1.275889  | 0.027950311 | 0.3936356  | 1 |
| GOBP_MYELOID_DENDRITIC_CELL_ACTIVATION                    | 24  | 0.54855806 | 1.6646781 | 0.028132992 | 0.13360703 | 1 |
| GOBP_MORPHOGENESIS_OF_A_BRANCHING_STRUCTURE               | 130 | 0.31090173 | 1.3661091 | 0.028213166 | 0.31018412 | 1 |
| GOBP_AMINO_ACID_IMPORT                                    | 35  | 0.48836574 | 1.6209402 | 0.028277636 | 0.1569793  | 1 |
| GOBP_POSITIVE_REGULATION_OF_PROTEIN_MATURATION            | 21  | 0.52976334 | 1.5693166 | 0.028277636 | 0.18538463 | 1 |
| GOBP_CELL_SUBSTRATE_ADHESION                              | 286 | 0.26755854 | 1.2835752 | 0.028571429 | 0.38818038 | 1 |
| GOBP_POSITIVE_REGULATION_OF_BIOMINERALIZATION             | 32  | 0.4690723  | 1.5311636 | 0.028645834 | 0.21103361 | 1 |
| GOBP_HEART_GROWTH                                         | 67  | 0.37428743 | 1.4523736 | 0.02917772  | 0.2524176  | 1 |

|                                                               |     |            |           |             |            |   |
|---------------------------------------------------------------|-----|------------|-----------|-------------|------------|---|
| GOBP_REGULATION_OF_SYSTEMIC_ARTERIAL_BLOOD_PRESSURE_BY_HORMON | 21  | 0.55347115 | 1.6301877 | 0.029776676 | 0.14973699 | 1 |
| GOBP_GLUCOSE_METABOLIC_PROCESS                                | 171 | 0.2916619  | 1.3156586 | 0.029810298 | 0.36087975 | 1 |
| GOBP_RESPONSE_TO_TUMOR_NECROSIS_FACTOR                        | 244 | 0.27353773 | 1.2890483 | 0.029900333 | 0.38541082 | 1 |
| GOBP_ACTIVATION_OF_PROTEIN_KINASE_ACTIVITY                    | 261 | 0.27118874 | 1.288631  | 0.029900333 | 0.38387525 | 1 |
| GOBP_GLUCOSE_IMPORT                                           | 56  | 0.39467975 | 1.4593046 | 0.029925186 | 0.25031373 | 1 |
| GOBP_RESPONSE_TO_GAMMA_RADIATION                              | 51  | 0.40809697 | 1.5108353 | 0.030456852 | 0.22105654 | 1 |
| GOBP_REGULATION_OF_SYSTEMIC_ARTERIAL_BLOOD_PRESSURE           | 52  | 0.39501446 | 1.4567316 | 0.031088082 | 0.2488664  | 1 |
| GOBP_REGULATION_OF_CYTOSOLIC_CALCIIUM_ION_CONCENTRATION       | 238 | 0.27131048 | 1.2785102 | 0.031347964 | 0.3892958  | 1 |
| GOBP_INORGANIC_ANION_TRANSPORT                                | 93  | 0.34173772 | 1.3983495 | 0.031578947 | 0.2880333  | 1 |
| GOBP_NEGATIVE_REGULATION_OF_SMOOTH_MUSCLE_CELL_PROLIFERATION  | 39  | 0.4512264  | 1.5125278 | 0.03166227  | 0.22030368 | 1 |
| GOBP_RESPONSE_TO_OXYGEN_LEVELS                                | 320 | 0.25372747 | 1.2256051 | 0.03169014  | 0.4450784  | 1 |
| GOBP_NEGATIVE_REGULATION_OF_HORMONE_SECRETION                 | 40  | 0.4402486  | 1.5229979 | 0.032098766 | 0.21675196 | 1 |
| GOBP_VITAMIN_TRANSPORT                                        | 26  | 0.50607175 | 1.6043423 | 0.03241895  | 0.16416503 | 1 |
| GOBP_POSITIVE_REGULATION_OF_RESPONSE_TO_CYTOKINE_STIMULUS     | 52  | 0.39326978 | 1.4369273 | 0.0325      | 0.2621337  | 1 |
| GOBP_POSITIVE_REGULATION_OF_INTERLEUKIN_8_PRODUCTION          | 50  | 0.42503026 | 1.5402062 | 0.032608695 | 0.20458354 | 1 |
| GOBP_MORPHOGENESIS_OF_AN_EPITHELIAL_SHEET                     | 53  | 0.40614572 | 1.4901894 | 0.032608695 | 0.2320668  | 1 |
| GOBP_RHYTHMIC_BEHAVIOR                                        | 28  | 0.49892747 | 1.5874543 | 0.032745592 | 0.17451696 | 1 |
| GOBP_POSITIVE_REGULATION_OF_NEURON_APOPTOTIC_PROCESS          | 43  | 0.4282864  | 1.5082614 | 0.032745592 | 0.22266446 | 1 |
| GOBP_SKELETAL_SYSTEM_DEVELOPMENT                              | 336 | 0.24885519 | 1.2080599 | 0.032846715 | 0.45633274 | 1 |
| GOBP_REGULATION_OF_GLUCOSE_IMPORT                             | 43  | 0.4142272  | 1.4636177 | 0.032911394 | 0.24858324 | 1 |
| GOBP_TYPE_2_IMMUNE_RESPONSE                                   | 29  | 0.46999162 | 1.5136541 | 0.032994922 | 0.2215268  | 1 |
| GOBP_TRANSFORMING_GROWTH_FACTOR_BETA_PRODUCTION               | 32  | 0.4360725  | 1.4616867 | 0.03309693  | 0.24803954 | 1 |
| GOBP_CYTOKINE_PRODUCTION_INVOLVED_IN_IMMUNE_RESPONSE          | 77  | 0.34759167 | 1.3937227 | 0.033942558 | 0.29063153 | 1 |
| GOBP_AMINO_ACID_TRANSPORT                                     | 96  | 0.34584203 | 1.4291879 | 0.034120735 | 0.26676744 | 1 |
| GOBP_CELLULAR_RESPONSE_TO_INSULIN_STIMULUS                    | 188 | 0.29383254 | 1.3260791 | 0.034267914 | 0.35331744 | 1 |
| GOBP_CELL_RECOGNITION                                         | 87  | 0.33424312 | 1.3619149 | 0.034759358 | 0.31486848 | 1 |
| GOBP_NEGATIVE_REGULATION_OF_IMMUNE_RESPONSE                   | 109 | 0.31280646 | 1.3255514 | 0.034883723 | 0.35247907 | 1 |
| GOBP_REGULATION_OF_TRANSMEMBRANE_RECEPTOR_PROTEIN_SERINE_THR  | 184 | 0.27965757 | 1.2789651 | 0.03508772  | 0.3901393  | 1 |
| GOBP_ACYLGLYCEROL_HOMEOSTASIS                                 | 21  | 0.5194638  | 1.5549836 | 0.03521127  | 0.19420867 | 1 |
| GOBP_LOCOMOTORY_BEHAVIOR                                      | 99  | 0.34826314 | 1.4180702 | 0.035230353 | 0.2733059  | 1 |
| GOBP_NEURON_DEATH                                             | 258 | 0.26737562 | 1.2680354 | 0.035256412 | 0.40427288 | 1 |
| GOBP_L GLUTAMATE_TRANSMEMBRANE_TRANSPORT                      | 18  | 0.527842   | 1.5780894 | 0.035377357 | 0.1802619  | 1 |
| GOBP_NEGATIVE_REGULATION_OF_LIPID_LOCALIZATION                | 38  | 0.43157429 | 1.4759239 | 0.035443038 | 0.24219804 | 1 |
| GOBP_ENDOCHONDRAL_BONE_MORPHOGENESIS                          | 41  | 0.4426073  | 1.5235417 | 0.035885166 | 0.21666226 | 1 |
| GOBP_OVULATION_CYCLE_PROCESS                                  | 33  | 0.44445822 | 1.476046  | 0.035989717 | 0.24270763 | 1 |
| GOBP_SMOOTH_MUSCLE_CELL_MIGRATION                             | 64  | 0.37268832 | 1.4242294 | 0.035989717 | 0.26777044 | 1 |
| GOBP_MODULATION_BY_HOST_OF_VIRAL_PROCESS                      | 24  | 0.5090256  | 1.5642644 | 0.036057692 | 0.18700196 | 1 |
| GOBP_POSITIVE_REGULATION_OF_CHEMOKINE_PRODUCTION              | 49  | 0.40914053 | 1.4926238 | 0.03617571  | 0.23330364 | 1 |



|                                                                  |     |            |           |             |            |   |
|------------------------------------------------------------------|-----|------------|-----------|-------------|------------|---|
| GOBP_OVARIAN_FOLLICLE_DEVELOPMENT                                | 39  | 0.44440693 | 1.5038838 | 0.036231883 | 0.22310026 | 1 |
| GOBP_POSITIVE_REGULATION_OF_REGULATED_SECRETORY_PATHWAY          | 33  | 0.47097206 | 1.5585326 | 0.036674816 | 0.19239    | 1 |
| GOBP_REGULATION_OF_MORPHOGENESIS_OF_A_BRANCHING_STRUCTURE        | 29  | 0.4730198  | 1.5527173 | 0.036745407 | 0.1963944  | 1 |
| GOBP_INTERLEUKIN_10_PRODUCTION                                   | 46  | 0.41959122 | 1.4913623 | 0.036939315 | 0.23317747 | 1 |
| GOBP_REGULATION_OF_FATTY_ACID_BIOSYNTHETIC_PROCESS               | 34  | 0.4726716  | 1.5524071 | 0.037037037 | 0.19600248 | 1 |
| GOBP_T_CELL_PROLIFERATION                                        | 154 | 0.29047146 | 1.3051513 | 0.037037037 | 0.36879575 | 1 |
| GOBP_NEGATIVE_REGULATION_OF_ERK1_AND_ERK2_CASCADE                | 58  | 0.3914383  | 1.4528172 | 0.037220843 | 0.25308514 | 1 |
| GOBP_NEURON_DEATH_IN_RESPONSE_TO_OXIDATIVE_STRESS                | 25  | 0.47611004 | 1.4630045 | 0.037406486 | 0.2474045  | 1 |
| GOBP_REGULATION_OF_MEIOTIC_CELL_CYCLE                            | 35  | 0.43033496 | 1.4827642 | 0.0375      | 0.23773126 | 1 |
| GOBP_POSITIVE_REGULATION_OF_CD4_POSITIVE_ALPHA_BETA_T_CELL_DIFFE | 27  | 0.46208552 | 1.5006269 | 0.037647057 | 0.22552568 | 1 |
| GOBP_POSITIVE_REGULATION_OF_T_HELPER_CELL_DIFFERENTIATION        | 18  | 0.5411019  | 1.5523087 | 0.03787879  | 0.19541539 | 1 |
| GOBP_NEGATIVE_REGULATION_OF_DNA_BINDING_TRANSCRIPTION_FACTOR_    | 129 | 0.31195375 | 1.345446  | 0.03846154  | 0.33273357 | 1 |
| GOBP_ACTIVATED_T_CELL_PROLIFERATION                              | 35  | 0.44284368 | 1.4683784 | 0.038560413 | 0.24680643 | 1 |
| GOBP_REGULATION_OF_LYMPHOCYTE_ACTIVATION                         | 358 | 0.2519036  | 1.2318856 | 0.03960396  | 0.436558   | 1 |
| GOBP_POSITIVE_REGULATION_OF_FIBROBLAST_PROLIFERATION             | 38  | 0.433618   | 1.5073769 | 0.0397878   | 0.22168538 | 1 |
| GOBP_NEGATIVE_REGULATION_OF_CELL_JUNCTION_ASSEMBLY               | 28  | 0.45912224 | 1.4704049 | 0.04010025  | 0.24504244 | 1 |
| GOBP_MUSCLE_STRUCTURE_DEVELOPMENT                                | 443 | 0.2370605  | 1.1903926 | 0.040145986 | 0.47932124 | 1 |
| GOBP_PLATELET_DEGRANULATION                                      | 103 | 0.3227491  | 1.3382673 | 0.04054054  | 0.3425311  | 1 |
| GOBP_CELLULAR_ION_HOMEOSTASIS                                    | 473 | 0.24351665 | 1.2207999 | 0.04074074  | 0.44808567 | 1 |
| GOBP_PEPTIDYL_TYROSINE_MODIFICATION                              | 287 | 0.25465563 | 1.2186251 | 0.04075235  | 0.4474419  | 1 |
| GOBP_REGULATION_OF_STRIATED_MUSCLE_CELL_DIFFERENTIATION          | 57  | 0.38304827 | 1.4347119 | 0.040983606 | 0.2637596  | 1 |
| GOBP_REGULATION_OF_FATTY_ACID_METABOLIC_PROCESS                  | 69  | 0.368728   | 1.4398158 | 0.041162226 | 0.2602797  | 1 |
| GOBP_PRI_MIRNA_TRANSCRIPTION_BY_RNA_POLYMERASE_II                | 46  | 0.4114461  | 1.4646825 | 0.041208792 | 0.24758299 | 1 |
| GOBP_REGULATION_OF_ENDOCYTOSIS                                   | 167 | 0.29220414 | 1.307685  | 0.041533545 | 0.3672503  | 1 |
| GOBP_CHONDROCYTE_DEVELOPMENT                                     | 23  | 0.5045406  | 1.5223132 | 0.041666668 | 0.21617806 | 1 |
| GOBP_RESPONSE_TO_INTERLEUKIN_1                                   | 162 | 0.29522476 | 1.311394  | 0.041666668 | 0.3615382  | 1 |
| GOBP_CHLORIDE_TRANSPORT                                          | 51  | 0.40936795 | 1.4764775 | 0.042105265 | 0.24269725 | 1 |
| GOBP_POSITIVE_REGULATION_OF_ACUTE_INFLAMMATORY_RESPONSE          | 16  | 0.55895907 | 1.5677698 | 0.042394016 | 0.18526083 | 1 |
| GOBP_NEGATIVE_REGULATION_OF_INTERFERON_GAMMA_PRODUCTION          | 26  | 0.47229737 | 1.5250707 | 0.042857144 | 0.21507181 | 1 |
| GOBP_PROTEIN_ACTIVATION_CASCADE                                  | 18  | 0.52268595 | 1.533806  | 0.04347826  | 0.20893866 | 1 |
| GOBP_NEGATIVE_REGULATION_OF_METAPHASE_ANAPHASE_TRANSITION_OF     | 41  | 0.41722292 | 1.4693096 | 0.04411765  | 0.24604127 | 1 |
| GOBP_REGULATION_OF_NMDA_RECEPTOR_ACTIVITY                        | 22  | 0.50804996 | 1.5354122 | 0.044226043 | 0.20746279 | 1 |
| GOBP_MUSCLE_CELL_DEVELOPMENT                                     | 114 | 0.31744838 | 1.3513032 | 0.044444446 | 0.32808298 | 1 |
| GOBP_POSITIVE_REGULATION_OF_FATTY_ACID_METABOLIC_PROCESS         | 23  | 0.48458526 | 1.4897547 | 0.044554457 | 0.23141451 | 1 |
| GOBP_MODIFIED_AMINO_ACID_TRANSPORT                               | 22  | 0.5052623  | 1.5155094 | 0.04477612  | 0.2197206  | 1 |
| GOBP_REGULATION_OF_MEMBRANE_POTENTIAL                            | 254 | 0.26092422 | 1.2374715 | 0.045161292 | 0.43316388 | 1 |
| GOBP_ANATOMICAL_STRUCTURE_HOMEOSTASIS                            | 359 | 0.2447722  | 1.2049781 | 0.045454547 | 0.45852616 | 1 |
| GOBP_REGULATION_OF_LYMPHOCYTE_DIFFERENTIATION                    | 148 | 0.29506212 | 1.2900873 | 0.045584045 | 0.38528833 | 1 |

|                                                           |     |            |           |             |            |   |
|-----------------------------------------------------------|-----|------------|-----------|-------------|------------|---|
| GOBP_RESPONSE_TO_DRUG                                     | 265 | 0.26179472 | 1.224937  | 0.045901638 | 0.44476187 | 1 |
| GOBP_REGULATION_OF_SYNCYTIUM_FORMATION_BY_PLASMA_MEMBRANE | 22  | 0.5169313  | 1.5374234 | 0.04622871  | 0.20623109 | 1 |
| GOBP_NEGATIVE_REGULATION_OF_DEFENSE_RESPONSE              | 158 | 0.2949184  | 1.3075849 | 0.046376813 | 0.36685875 | 1 |
| GOBP_REGULATION_OF_LEUKOCYTE_PROLIFERATION                | 187 | 0.28061974 | 1.2731317 | 0.04658385  | 0.39715132 | 1 |
| GOBP_BEHAVIOR                                             | 326 | 0.25575623 | 1.2428783 | 0.04682274  | 0.42691338 | 1 |
| GOBP_REGULATION_OF_BMP_SIGNALING_PATHWAY                  | 63  | 0.3628023  | 1.3759134 | 0.046875    | 0.30422214 | 1 |
| GOBP_NEGATIVE_REGULATION_OF_ANION_TRANSMEMBRANE_TRANSPORT | 25  | 0.4804879  | 1.4936552 | 0.047058824 | 0.2334509  | 1 |
| GOBP_REGULATION_OF_MACROPHAGE_DIFFERENTIATION             | 17  | 0.53383994 | 1.5301964 | 0.047732696 | 0.21150734 | 1 |
| GOBP_NEGATIVE_REGULATION_OF_INFLAMMATORY_RESPONSE         | 101 | 0.32762104 | 1.3489784 | 0.048257373 | 0.33112124 | 1 |
| GOBP_NEGATIVE_REGULATION_OF_CHEMOKINE_PRODUCTION          | 18  | 0.54455674 | 1.5421314 | 0.04842615  | 0.20351543 | 1 |
| GOBP_REGULATION_OF_RECEPTOR_SIGNALING_PATHWAY_VIA_STAT    | 60  | 0.369896   | 1.3930354 | 0.048469387 | 0.29053694 | 1 |
| GOBP_MEIOTIC_CELL_CYCLE                                   | 171 | 0.28194922 | 1.269467  | 0.048484847 | 0.402304   | 1 |
| GOBP_CELLULAR_RESPONSE_TO_HORMONE_STIMULUS                | 470 | 0.22657108 | 1.1493671 | 0.048507463 | 0.52446216 | 1 |
| GOBP_SIGNALING_RECEPTOR_LIGAND_PRECURSOR_PROCESSING       | 19  | 0.52474    | 1.5067701 | 0.048611112 | 0.22102521 | 1 |
| GOBP_CELL_KILLING                                         | 100 | 0.3226498  | 1.3458236 | 0.048710603 | 0.333259   | 1 |
| GOBP_REPLICATION_FORK_PROCESSING                          | 34  | 0.44972286 | 1.4786587 | 0.048843186 | 0.23992617 | 1 |
| GOBP_REGULATION_OF_WOUND_HEALING                          | 95  | 0.3262658  | 1.3236412 | 0.049479168 | 0.3537076  | 1 |
| GOBP_NEGATIVE_REGULATION_OF_LIPID_STORAGE                 | 19  | 0.54780394 | 1.6011823 | 0.04987531  | 0.16387545 | 1 |
| GOBP_MAST_CELL_ACTIVATION                                 | 47  | 0.3874453  | 1.4032491 | 0.04987531  | 0.28288406 | 1 |
| GOBP_POSITIVE_REGULATION_OF_LIPID_BIOSYNTHETIC_PROCESS    | 60  | 0.36644855 | 1.3866554 | 0.05        | 0.29249242 | 1 |

**Kramer et al. Supplemental Table 4**

| <b>Oligonucleotides (5'-&gt;3')</b> |                               |                           |
|-------------------------------------|-------------------------------|---------------------------|
| <b>Genotyping PCR</b>               |                               |                           |
| Lyz2-cre                            | CCCAGAAATGCCAGATTACG          | CTTGGGCTGCCAGAATTTCTC     |
| Ctnnb1Ex3Δ                          | CATTGCGTGGACAATGGCTACTCA      | CTAAGCTTGGCTGGACGTAAACTC  |
| ROSA26-EYFP                         | AGGGCGAGGAGCTGTTCA            | TGAAGTCGATGCCCTTACG       |
| <b>CUT&amp;RUN qPCR</b>             |                               |                           |
| Tnf -408                            | CCCCATGGATGTCCCATTT           | TGTAGAAAGACCATGCCTGTG     |
| Axin2 -340                          | GCGGATCTAGCTCCTACCAG          | TCAAATCAAACACGTTCTACCTT   |
| <b>qRT-PCR</b>                      |                               |                           |
|                                     | <b>Forward</b>                | <b>Reverse</b>            |
| Ppia                                | GGCAAATGCTGGACCAAAC           | CATTCTGGACCCAAAACG        |
| Axin2                               | GCTGCGCTTTGATAAGGTCC          | GCAATCGGCTTGGTCTCTCT      |
| Ccnd1                               | CGCCCTCCGTATCTTACTTC          | AAGCGGTCCAGGTAGTTCAT      |
| Cd63                                | CAGGTTAGGAGTGTAAAGGCCG        | ATGGCGATCAATCCCACTGC      |
| Lyz1                                | GCAGTGCTCTGCTGCAGGAT          | GTCAGACTCCGAGTTCGGA       |
| Pla2g7                              | AGGCTGTATGCTCAACCCAC          | TTTGATGTTCTGGTCACTGCAC    |
| Mfge8                               | GTGCCCTGTGGGCTACTC            | GTATTGGGGACGGCTGTG        |
| Abca1                               | GGTTTGGAGATGGTTATAACAATAGTTGT | CCCGGAAACGCAAGTCC         |
| Gpnmb                               | GAAGCCAGCATCTCAGGTTC          | TGAACACCGACCCAGTTTT       |
| C3ar1                               | CAGGCAAGGGATTACTTTTTGG        | TGTGAGGACATTAGGAGGCTTTCC  |
| Mmp12                               | TTTCTCCATATGGCCAAGC           | GGTCAAAGACAGCTGCATCA      |
| Tnf                                 | GGTCTGGCCATAGAACTGA           | CAGCCTCTTCTATTCTCTGC      |
| Il1a                                | TTCTATGATGCAAGCTATGGCTCA      | CGGCTCTCCTGAAGGTGA        |
| Timd4                               | CGTATAGAGGTGCCTGGCTGGTTC      | GGGCACGTGGTCACTGCTGTAC    |
| Lyve1                               | TGGTGTTACTCCTCGCCTCT          | TTCTGCGCTGACTCTACCTG      |
| Adgre1                              | GAAGCATCCGAGACACACAC          | TTGTGGTTCTGAACAGCACG      |
| Siglecf                             | CAGGGACGTACTTCTTCAGATTGG      | GGGTAGATGTGACTTGGATGTTAGG |
| Plet1                               | CACTATGGCTAACGTCTCTGG         | CTGTCGTCTCCTTCACTG        |
| Fabp5                               | TGAAAGAGCTAGGAGTAGGACTG       | CTCTCGTTTTGACCGTGATG      |
| Net1                                | ACATTCTCGTGAAGTGGTTA          | GCTGGAGGAAGTCTTGGA        |
| Trp2                                | CCTGAATGGGACCAATGCCT          | AGGCATCTGTGGAAGGGTTG      |
| Pmel                                | GGGGATGCATTTGAGCTGAC          | CTGGCACCTGGTGATGAAA       |

**Kramer et al. Supplemental Table 5**

| <b>Flow Cytometry Antibodies</b>                                        | <b>Source</b>             | <b>Identifier</b> |
|-------------------------------------------------------------------------|---------------------------|-------------------|
| <b>Analysis of Lung Active <math>\beta</math>-catenin</b>               |                           |                   |
| Anti mouse CD16/CD32 FC                                                 | BD Bioscience             | Cat # 553142      |
| BUV395 anti mouse CD45                                                  | BD Bioscience             | Cat # 564616      |
| AlexaFluor 488 anti mouse Non-phospho (Active) $\beta$ -Catenin (Ser45) | Cell Signaling Technology | Cat # 70034       |
| <b>Analysis of the Lung Microenvironment</b>                            |                           |                   |
| Anti mouse CD16/CD32 FC                                                 | BD Bioscience             | Cat # 553142      |
| PerCP-Cy5.5 anti mouse CD64                                             | Biolegend                 | Cat # 139307      |
| BV711 anti mouse CD11b                                                  | Biolegend                 | Cat # 101241      |
| BV510 anti mouse MHCII                                                  | Biolegend                 | Cat # 107635      |
| PE anti mouse CD24                                                      | Biolegend                 | Cat # 101807      |
| APC anti mouse CD45                                                     | Biolegend                 | Cat # 103112      |
| PE-Cy7 anti mouse CD11c                                                 | Biolegend                 | Cat # 117318      |
| Pacific Blue anti mouse Ly6G                                            | Biolegend                 | Cat # 127612      |
| AlexaFluor 700 anti mouse Ly6C                                          | Biolegend                 | Cat # 128024      |
| <b>Analysis of the Tumor Microenvironment</b>                           |                           |                   |
| Anti mouse CD16/CD32 FC                                                 | BD Bioscience             | Cat # 553142      |
| APC anti mouse CD45                                                     | Biolegend                 | Cat # 103112      |
| BV711 anti mouse CD11b                                                  | Biolegend                 | Cat # 101241      |
| Pacific Blue anti mouse Ly6G                                            | Biolegend                 | Cat # 127612      |
| AlexaFluor 700 anti mouse Ly6C                                          | Biolegend                 | Cat # 128024      |
| PE-Cy7 anti mouse CD11c                                                 | Biolegend                 | Cat # 117318      |
| BUV395 anti mouse CD3                                                   | BD Bioscience             | Cat # 563565      |
| FITC anti mouse CD4                                                     | BD Pharmigen              | Cat # 553047      |
| BV650 anti mouse CD8                                                    | Biolegend                 | Cat # 100742      |
| BV605 anti mouse F4/80                                                  | Biolegend                 | Cat # 123133      |
| <b>Analysis of the Neonatal Liver-Derived Macrophages</b>               |                           |                   |
| Anti mouse CD16/CD32 FC                                                 | BD Bioscience             | Cat # 553142      |
| PE-Cy7 anti mouse CD11c                                                 | Biolegend                 | Cat # 117318      |
| BV605 anti mouse F4/80                                                  | Biolegend                 | Cat # 123133      |
| <b>Fluorescence Assisted Cell Sorting</b>                               |                           |                   |
| Anti mouse CD16/CD32 FC                                                 | BD Bioscience             | Cat # 553142      |
| APC anti mouse CD45                                                     | Biolegend                 | Cat # 103112      |
| Pacific Blue anti mouse Ly6G                                            | Biolegend                 | Cat # 127612      |
| PE-Cy7 anti mouse CD11c                                                 | Biolegend                 | Cat # 117318      |
| <b>CUT&amp;RUN</b>                                                      |                           |                   |
| $\beta$ -Catenin (D10A8) XP                                             | Cell Signaling Technology | Cat # 8480        |
| Rabbit (DA1E) mAb IgG XP Isotype Control                                | Cell Signaling Technology | Cat # 66362       |
| <b>In Vivo Antibody Treatments</b>                                      |                           |                   |
| InVivoMAb anti-mouse TNF $\alpha$                                       | BioXCell                  | Cat # BE0058      |
| <b>In Vivo Alveolar Macrophage Depletion</b>                            |                           |                   |
| Clodronate liposomes (neutral)                                          | FormuMax                  | Cat # F70101C-N   |
| <b>Chemicals, Peptides, and Recombinant Proteins</b>                    |                           |                   |
| Mouse GM-CSF                                                            | Peprtech                  | Cat # 315-03      |
| Mouse M-CSF                                                             | Peprtech                  | Cat # 315-02      |
| Mouse Wnt-3a                                                            | Peprtech                  | Cat # 315-20      |
| Lithium Chloride                                                        | Sigma                     | Cat # L9650       |
| Lipopolysaccharides (LPS)                                               | Sigma                     | Cat # L2630       |
| Cellstripper                                                            | Corning                   | Cat # 25-056-CI   |

|                                      |                    |                 |
|--------------------------------------|--------------------|-----------------|
| Dulbecco's PBS                       | Corning            | Cat # 20-031-CV |
| FBS                                  | Corning            | Cat # 35-011-CV |
| EDTA                                 | Corning            | Cat # 46-034-CL |
| Trypsin EDTA 1X                      | Corning            | Cat # 25-053-CL |
| Trypan Blue Solution, 0.4%           | Gibco              | Cat # 15250061  |
| DAPI                                 | ThermoFisher       | Cat # 62248     |
| ACK Lysis Buffer                     | Gibco              | Cat # A1049201  |
| Matrigel                             | Corning Inc.       | Cat # 356234    |
| L-glutamine                          | Gibco              | Cat # 25030081  |
| Sodium Pyruvate                      | Gibco              | Cat # 11360070  |
| 2-mercaptoethanol                    | Gibco              | Cat # 31350010  |
| Pen/Strep                            | Gibco              | Cat # 10378016  |
| Collagenase/Hyaluronidase            | Stemcell           | Cat # 07912     |
| Live/Dead Blue                       | ThermoFisher       | Cat # L23105    |
| SYBR Green PCR Master Mix            | Applied Biosystems | Cat # 4309155   |
| D-luciferin                          | GoldBio            | Cat # Luck-100  |
| TriTrack DNA Loading Dye (6X)        | ThermoFisher       | Cat # R1161     |
| GeneRuler 100 bp DNA Ladder          | ThermoFisher       | Cat # SM0243    |
| DirectPCR Lysis Reagent (Mouse Tail) | Viagen Biotech     | Cat # 102-T     |
| Methanol, 99.9%                      | ThermoFisher       | Cat # 176845000 |
| Crystal violet solution              | Sigma              | Cat # V5265     |

| <b>Critical Commercial Assays</b>         |                           |                   |
|-------------------------------------------|---------------------------|-------------------|
| RNeasy Mini Kit                           | Qiagen                    | Cat # 74104       |
| iScript cDNA synthesis kit                | Bio-Rad                   | Cat # 1708890     |
| ELISA MAX™ Deluxe Set Mouse TNF- $\alpha$ | Biolegend                 | Cat # 430904      |
| CUT&RUN Assay Kit                         | Cell Signaling Technology | Cat # 86652       |
| DNA Purification Kit                      | Cell Signaling Technology | Cat # 14209       |
| FoxP3 Staining Buffer Set                 | Miltenyi Biotec           | Cat # 130-093-142 |

| <b>Deposited Data</b> |                        |                 |
|-----------------------|------------------------|-----------------|
| RNA-Seq Data          | This paper             | GSE200508       |
| scRNA-Seq Data        | Zhu et al. 2021        | GSE164793       |
| scRNA-Seq Data        | Travaglini et al. 2020 | EGAS00001004344 |

| <b>Experimental Models: Organisms/ Strains</b> |                            |                    |
|------------------------------------------------|----------------------------|--------------------|
| C57BL/6 Mice                                   | Charles River Laboratories | Strain Code 556    |
| C57BL/6 Lyz2-cre+/+ Mice                       | The Jackson Laboratory     | Strain Code 004781 |
| C57BL/6 ROSA26-EYFP+/+ Mice                    | The Jackson Laboratory     | Strain Code 006148 |
| C57BL/6 Ctnnb1Ex3 $\Delta$ /Ex3 $\Delta$ Mice  | Harada et al. 1999         |                    |

| <b>Experimental Models: Cell Lines</b> |                                     |                |
|----------------------------------------|-------------------------------------|----------------|
| B16F10                                 | ATCC                                | Cat # CLR-6475 |
| E0771.ML-1                             | Liu et al., 2021                    |                |
| LLC-luc                                | Dr. Pamela Hershberger, Buffalo, NY |                |

## **Supplemental Table Legends**

**Supplemental Tables 1-3 Related to Figure 4 & Supplemental Figure 4.** Complete lists of significantly, (adjusted) p-values < 0.05, differentially expressed genes in *Lyz2-Cre<sup>+/+</sup>YFP<sup>+/-</sup>* *Ctnnb1<sup>Ex3Δ/wt</sup>* versus *Lyz2-Cre<sup>+/+</sup>YFP<sup>+/-</sup>* non-tumor bearing AMs (Supplemental Table 1), and pathways upregulated in the former population of AMs identified by Gene Set Enrichment Analysis with (NOM) p-values < 0.05 (Supplemental Table 2 & 3).

**Supplemental Table 4.** Primer pairs utilized for murine genotyping, CUT&RUN, and qRT-PCR experiments.

**Supplemental Table 5.** Key resources, antibodies, reagents, cell and animal lines used in this study.
